# Supplementary material
Source: publisher figshare collection journal article supplement (https://acs.figshare.com/ndownloader/files/5165767)
Supplement: Supplementary file 1 [file 5165767]

#===========
OM  049807g
#============
data_CRYSTALS_cif 
_audit_creation_date        03-02-10
_audit_creation_method CRYSTALS_ver_12-03-99
                                                                                
                                                                                
                                                                                
_publ_contact_author_name     'Dr. F. Rose-Munch' 
_publ_contact_author_address                                                    
;
Laboratoire de Synthese Organique et Organometallique,
UMR7611, Universite Pierre et Marie Curie,
4 place Jussieu, case courier 181,
75252 Paris Cedex 05, France. 
;                                                                               
                                                                                
_publ_contact_author_phone             '33 1 44 27 62 35'
_publ_contact_author_fax               '33 1 44 27 55 04'
_publ_contact_author_email             'rosemun@ccr.jussieu.fr'
_publ_requested_journal                'Organometallics'
_publ_requested_category               ''
_publ_requested_coeditor_name          '' 
                                                                                
                                                                                
_publ_section_title                                                             
;                                                                               
Cationic (h6-Arene)tricarbonylmanganese Linked to Neutral
(h6-Arene)tricarbonylchromium complexes.
;                                                                               
                                                                                
loop_                                                                           
        _publ_author_name                                
        _publ_author_address  
                                                                                
'Schouteeten, S.' 
;                                                                               
 Laboratoire de Synthese Organique et Organometallique,
UMR7611, Universite Pierre et Marie Curie,
4 place Jussieu, case courier 181,
75252 Paris Cedex 05, France. 
;                                                                               
                                                                                
                                                                                
'Tranchier, J.P.'
;                                                                               
 Laboratoire de Synthese Organique et Organometallique,
UMR7611, Universite Pierre et Marie Curie,
4 place Jussieu, case courier 181,
75252 Paris Cedex 05, France. 
;                                                                               

'Rose-Munch, F.'
;
Laboratoire de Synthese Organique et Organometallique,
UMR7611, Universite Pierre et Marie Curie,
4 place Jussieu, case courier 181,
75252 Paris Cedex 05, France.
;

'Rose, E.'
;
Laboratoire de Synthese Organique et Organometallique,
UMR7611, Universite Pierre et Marie Curie,
4 place Jussieu, case courier 181,
75252 Paris Cedex 05, France.
;

'Auffrant, A.'
;
Laboratoire de Synthese Organique et Organometallique,
UMR7611, Universite Pierre et Marie Curie,
4 place Jussieu, case courier 181,
75252 Paris Cedex 05, France. 
;

'Stephenson, R.'
;
?
;
#==================                                                                                
C21 H13 Cr1 Mn1 O7
#==================                                                                                
_chemical_name_systematic       
;                                                                               
?                                                                               
;                                                                               
                                                                                
_chemical_melting_point                   ?   
                                                                                
_refine_ls_matrix_type                      'full'
                                                                                
_atom_sites_solution_primary                'direct' 
                                                                                
_atom_sites_solution_secondary              'difmap' 
_atom_sites_solution_hydrogens              'geom' 
_refine_ls_hydrogen_treatment               'refU'
_publ_section_exptl_refinement                                                  
;                                                                               
 H atoms placed geometrically after each cycle
one overall isotropic thermal parameter refined. 
;                                                                               
_computing_structure_refinement 
; 
 CRYSTALS (Watkin et al 2001) 
; 
_computing_publication_material 
; 
 CRYSTALS (Watkin et al 2001) 
; 
_computing_molecular_graphics 
; 
 CAMERON (Watkin et al 1996) 
; 

_cell_length_a                    14.774(5)
_cell_angle_alpha                 90
_cell_length_b                    12.732(3)
_cell_angle_beta                  94.31(3)
_cell_length_c                    21.413(6)
_cell_angle_gamma                 90
_cell_volume                      4016(2) 
 
_symmetry_cell_setting            'Monoclinic' 
_symmetry_space_group_name_H-M    'P 1 21/c 1 ' 
loop_
 _symmetry_equiv_pos_as_xyz
 'x,y,z'
 '-x,-y,-z'
 '-x,y+1/2,-z+1/2'
 'x,-y+1/2,z+1/2'
 

_chemical_absolute_configuration  '.' 
 
loop_
_atom_type_symbol
_atom_type_scat_dispersion_real
_atom_type_scat_dispersion_imag
_atom_type_scat_Cromer_Mann_a1
_atom_type_scat_Cromer_Mann_b1
_atom_type_scat_Cromer_Mann_a2
_atom_type_scat_Cromer_Mann_b2
_atom_type_scat_Cromer_Mann_a3
_atom_type_scat_Cromer_Mann_b3
_atom_type_scat_Cromer_Mann_a4
_atom_type_scat_Cromer_Mann_b4
_atom_type_scat_Cromer_Mann_c
_atom_type_scat_source  
 'C   '    0.0033    0.0016    2.3100   20.8439
    1.0200   10.2075    1.5886    0.5687    0.8650   51.6512    0.2156
'International_Tables_Vol_IV_Table_2.2B'
 'H   '    0.0000    0.0000    0.4930   10.5109
    0.3229   26.1257    0.1402    3.1424    0.0408   57.7998    0.0030
'International_Tables_Vol_IV_Table_2.2B'
 'O   '    0.0106    0.0060    3.0485   13.2771
    2.2868    5.7011    1.5463    0.3239    0.8670   32.9089    0.2508
'International_Tables_Vol_IV_Table_2.2B'
 'Mn  '    0.3368    0.7283   11.2819    5.3409
    7.3573    0.3432    3.0193   17.8674    2.2441   83.7543    1.0896
'International_Tables_Vol_IV_Table_2.2B'
 'Cr  '    0.3209    0.6236   10.6406    6.1038
    7.3537    0.3920    3.3240   20.2626    1.4922   98.7399    1.1832
'International_Tables_Vol_IV_Table_2.2B'
 
 
_cell_formula_units_Z                    8
_chemical_formula_sum             ' C21 H13 Cr1 Mn1 O7 '
_chemical_formula_moiety          ' C21 H13 Cr1 Mn1 O7 '
_chemical_compound_source
;
?
;
_chemical_formula_weight            484.25
 
 
_cell_measurement_reflns_used           25
_cell_measurement_theta_min             13
_cell_measurement_theta_max             13.5
_cell_measurement_temperature          295
 
_exptl_crystal_description        ' parallelepiped ' 
_exptl_crystal_colour             ' orange ' 
_exptl_crystal_size_min           0.30 
_exptl_crystal_size_mid           0.40 
_exptl_crystal_size_max           0.60 
 
_exptl_crystal_density_diffrn     1.602 
_exptl_crystal_density_meas       ? 
_exptl_crystal_F_000              1952.000 
_exptl_absorpt_coefficient_mu     1.210 

 
_diffrn_measurement_device_type 
; 
Enraf-Nonius Mach3 
; 
_diffrn_radiation_monochromator   graphite 
_computing_data_collection 
; 
 Cad4 Express, (Enraf-Nonius, 1989) 
; 
_computing_data_reduction 
; 
 RC93 (Watkin, Prout & Lilley, 1994) 
; 
_computing_cell_refinement 
; 
 Cad4 Express, (Enraf-Nonius, 1989) 
; 
_computing_structure_solution 
; 
 SHELXS 86 (Sheldrick, 1986) 
; 
_diffrn_measurement_method        \w/2\q 
_exptl_absorpt_correction_type    'refdelf' 
_exptl_absorpt_process_details 
; 
 DIFABS (Walker & Stuart, 1983) 
; 
_exptl_absorpt_correction_T_min   0.54 
_exptl_absorpt_correction_T_max   0.70 
 
_diffrn_standards_interval_time   3600 
_diffrn_standards_interval_count  0 
_diffrn_standards_number          2 
_diffrn_standards_decay_%         5.97 
 
_diffrn_ambient_temperature        295
_diffrn_ambient_pressure          1
_diffrn_reflns_number             7713 
_reflns_number_total              7052 
_diffrn_reflns_av_R_equivalents   1.90 

_diffrn_reflns_theta_min          1.382 
_diffrn_reflns_theta_max          24.981 
_diffrn_measured_fraction_theta_max 0.999 
 
_diffrn_reflns_theta_full         24.981 
_diffrn_measured_fraction_theta_full 0.999 
 
 
_diffrn_reflns_limit_h_min        0 
_diffrn_reflns_limit_h_max        17 
_diffrn_reflns_limit_k_min        0 
_diffrn_reflns_limit_k_max        15 
_diffrn_reflns_limit_l_min        -25 
_diffrn_reflns_limit_l_max        25 
_reflns_limit_h_min               -17 
_reflns_limit_h_max               17 
_reflns_limit_k_min               0 
_reflns_limit_k_max               15 
_reflns_limit_l_min               0 
_reflns_limit_l_max               25 
 
 
_refine_diff_density_min          -0.45 
_refine_diff_density_max          0.44 
 
 
_refine_ls_number_reflns          3313 
_refine_ls_number_parameters      542 
 
_refine_ls_R_factor_ref           0.0455 
_refine_ls_wR_factor_ref          0.0542 
_refine_ls_goodness_of_fit_ref    1.1566 
 
_reflns_number_all                7052 
_refine_ls_R_factor_all           0.1314 
_refine_ls_wR_factor_all          0.0618 
 
# The I/u(I) cutoff below was used for refinement as 
# well as the _gt R-factors:
_reflns_threshold_expression      I>3.00u(I)
_reflns_number_gt                 3313 
_refine_ls_R_factor_gt            0.0455 
_refine_ls_wR_factor_gt           0.0542 
 
 
_refine_ls_shift/su_max           0.000387 
_refine_ls_structure_factor_coef  'F' 
_refine_ls_weighting_scheme       'calc' 
_refine_ls_weighting_details 
;
Method = Prince modified Chebychev polynomial, (Watkin, 1994) 
 W = [weight] * [1-(deltaF/6*sigmaF)^2]^2 
 
 3.79 0.649 2.86 
;
_diffrn_radiation_type            'Mo K\a'
_diffrn_radiation_wavelength           0.71073
 
 
_publ_section_references 
; 
 
 
Enraf-Nonius, (1989) Cad4 Express. 
 
 
Sheldrick, G.M. (1986). SHELXS86. Program for the solution of 
crystal structures. Univ. of Gottingen, Federal Republic of Germany. 
 
 
Walker, N., and Stuart, D. Acta Cryst, (1983) A39, 158-166 
 
 
Watkin D.J. (1994), 
Acta Cryst, A50, 411-437 
Prince, E. 
Mathematical Techniques in Crystallography 
and Materials Science 
Springer-Verlag, New York, 1982. 
 
 
Watkin, D.J., Prout, C.K., Carruthers, J.R., Betteridge, P.W. & Cooper 
R.I. (2001) CRYSTALS 
Issue 11. Chemical Crystallography Laboratory, OXFORD, UK. 
 
 
Watkin, D.J., Prout, C.K. & Pearce, L.J. (1996) CAMERON, Chemical 
Crystallography Laboratory, OXFORD, UK. 
 
 
Watkin, D.J., Prout, C.K., Lilley, P.M.deQ. (1994), RC93, Chemical 
Crystallography Laboratory, Oxford, UK. 
; 


loop_
_atom_site_label
_atom_site_type_symbol
_atom_site_fract_x
_atom_site_fract_y
_atom_site_fract_z
_atom_site_U_iso_or_equiv
_atom_site_occupancy
_atom_site_adp_type
_atom_site_attached_hydrogens
Cr1 Cr 0.77308(6) 0.84594(8) 0.01504(5) 0.0388 1.0000 Uani  .
Mn1 Mn 0.49347(7) 0.67275(8) -0.24599(5) 0.0470 1.0000 Uani  .
O1 O 0.4595(4) 0.6530(4) -0.3928(2) 0.0710 1.0000 Uani  .
O2 O 0.6990(4) 1.0444(5) 0.0644(3) 0.0799 1.0000 Uani  .
O3 O 0.5844(4) 0.7700(6) -0.0086(4) 0.1180 1.0000 Uani  .
O4 O 0.7837(5) 0.7622(6) 0.1445(3) 0.1108 1.0000 Uani  .
O5 O 0.5087(4) 0.5280(5) -0.1390(2) 0.0781 1.0000 Uani  .
O6 O 0.4266(5) 0.8392(5) -0.1673(3) 0.0966 1.0000 Uani  .
O7 O 0.3115(4) 0.5929(7) -0.2865(3) 0.1274 1.0000 Uani  .
C1 C 0.6318(4) 0.7401(6) -0.2400(3) 0.0490 1.0000 Uani  .
C2 C 0.6388(6) 0.6358(6) -0.2627(3) 0.0644 1.0000 Uani  .
C3 C 0.5780(5) 0.6034(6) -0.3132(3) 0.0571 1.0000 Uani  .
C4 C 0.5213(5) 0.6771(6) -0.3446(3) 0.0561 1.0000 Uani  .
C5 C 0.5166(5) 0.7786(6) -0.3210(3) 0.0621 1.0000 Uani  .
C6 C 0.5947(5) 0.8226(6) -0.2829(3) 0.0669 1.0000 Uani  .
C7 C 0.6842(5) 0.7691(5) -0.1837(3) 0.0520 1.0000 Uani  .
C8 C 0.7290(5) 0.7933(5) -0.1387(3) 0.0509 1.0000 Uani  .
C9 C 0.7916(4) 0.8162(5) -0.0864(3) 0.0404 1.0000 Uani  .
C10 C 0.8308(4) 0.7313(5) -0.0488(3) 0.0510 1.0000 Uani  .
C11 C 0.8941(4) 0.7512(5) 0.0003(3) 0.0478 1.0000 Uani  .
C12 C 0.9216(4) 0.8529(6) 0.0147(3) 0.0549 1.0000 Uani  .
C13 C 0.8838(4) 0.9374(6) -0.0209(3) 0.0536 1.0000 Uani  .
C14 C 0.8191(4) 0.9187(5) -0.0718(3) 0.0435 1.0000 Uani  .
C15 C 0.4494(7) 0.5448(8) -0.4107(4) 0.0890 1.0000 Uani  .
C16 C 0.7292(5) 0.9680(6) 0.0453(3) 0.0509 1.0000 Uani  .
C17 C 0.6582(5) 0.7986(6) 0.0008(4) 0.0628 1.0000 Uani  .
C18 C 0.7781(5) 0.7928(6) 0.0942(4) 0.0601 1.0000 Uani  .
C19 C 0.5034(5) 0.5823(6) -0.1812(3) 0.0556 1.0000 Uani  .
C20 C 0.4516(5) 0.7747(7) -0.1990(4) 0.0651 1.0000 Uani  .
C21 C 0.3821(6) 0.6245(8) -0.2707(4) 0.0776 1.0000 Uani  .
Cr101 Cr 0.26504(6) 0.61749(8) 0.01297(4) 0.0404 1.0000 Uani  .
Mn101 Mn -0.02866(6) 0.44219(8) -0.23743(4) 0.0433 1.0000 Uani  .
O101 O -0.0710(3) 0.4261(4) -0.3847(2) 0.0554 1.0000 Uani  .
O102 O 0.2072(5) 0.8226(5) 0.0630(3) 0.0956 1.0000 Uani  .
O103 O 0.2592(6) 0.5313(7) 0.1416(3) 0.1279 1.0000 Uani  .
O104 O 0.0686(4) 0.5740(7) -0.0157(4) 0.1385 1.0000 Uani  .
O105 O -0.0188(5) 0.2979(5) -0.1300(3) 0.0862 1.0000 Uani  .
O106 O -0.0829(6) 0.6166(5) -0.1609(4) 0.1167 1.0000 Uani  .
O107 O -0.2156(4) 0.3696(7) -0.2711(3) 0.1138 1.0000 Uani  .
C101 C 0.1117(4) 0.5077(5) -0.2365(3) 0.0457 1.0000 Uani  .
C102 C 0.1097(5) 0.4028(6) -0.2571(3) 0.0537 1.0000 Uani  .
C103 C 0.0479(4) 0.3709(5) -0.3064(3) 0.0463 1.0000 Uani  .
C104 C -0.0064(4) 0.4465(5) -0.3372(3) 0.0412 1.0000 Uani  .
C105 C -0.0060(4) 0.5494(5) -0.3145(3) 0.0486 1.0000 Uani  .
C106 C 0.0803(5) 0.5909(5) -0.2826(3) 0.0562 1.0000 Uani  .
C107 C 0.1688(4) 0.5340(5) -0.1818(3) 0.0493 1.0000 Uani  .
C108 C 0.2186(5) 0.5556(5) -0.1376(3) 0.0523 1.0000 Uani  .
C109 C 0.2840(4) 0.5771(5) -0.0866(3) 0.0406 1.0000 Uani  .
C110 C 0.3152(4) 0.4928(5) -0.0474(3) 0.0456 1.0000 Uani  .
C111 C 0.3796(4) 0.5118(5) 0.0023(3) 0.0475 1.0000 Uani  .
C112 C 0.4142(4) 0.6137(6) 0.0137(3) 0.0534 1.0000 Uani  .
C113 C 0.3813(4) 0.6960(6) -0.0246(3) 0.0506 1.0000 Uani  .
C114 C 0.3172(4) 0.6781(5) -0.0742(3) 0.0457 1.0000 Uani  .
C115 C -0.0870(5) 0.3174(6) -0.3996(3) 0.0644 1.0000 Uani  .
C116 C 0.2307(5) 0.7438(6) 0.0436(3) 0.0594 1.0000 Uani  .
C117 C 0.2603(5) 0.5629(7) 0.0917(4) 0.0686 1.0000 Uani  .
C118 C 0.1457(6) 0.5891(7) -0.0037(4) 0.0738 1.0000 Uani  .
C119 C -0.0204(5) 0.3531(6) -0.1721(3) 0.0513 1.0000 Uani  .
C120 C -0.0630(5) 0.5494(6) -0.1907(4) 0.0611 1.0000 Uani  .
C121 C -0.1438(5) 0.3983(7) -0.2578(3) 0.0639 1.0000 Uani  .
H2 H 0.6679 0.5698 -0.2362 0.069(4) 1.0000 Uiso  .
H3 H 0.5790 0.5235 -0.3247 0.069(4) 1.0000 Uiso  .
H5 H 0.4771 0.8332 -0.3478 0.069(4) 1.0000 Uiso  .
H10 H 0.8077 0.6520 -0.0604 0.069(4) 1.0000 Uiso  .
H11 H 0.9187 0.6848 0.0275 0.069(4) 1.0000 Uiso  .
H12 H 0.9746 0.8635 0.0535 0.069(4) 1.0000 Uiso  .
H13 H 0.9023 1.0072 -0.0063 0.069(4) 1.0000 Uiso  .
H14 H 0.7790 0.9820 -0.0919 0.069(4) 1.0000 Uiso  .
H61 H 0.5800 0.8947 -0.2650 0.069(4) 1.0000 Uiso  .
H62 H 0.6500 0.8420 -0.3143 0.069(4) 1.0000 Uiso  .
H151 H 0.4223 0.5153 -0.3753 0.069(4) 1.0000 Uiso  .
H152 H 0.4271 0.5380 -0.4504 0.069(4) 1.0000 Uiso  .
H153 H 0.5031 0.5065 -0.4150 0.069(4) 1.0000 Uiso  .
H102 H 0.1535 0.3467 -0.2296 0.069(4) 1.0000 Uiso  .
H103 H 0.0513 0.3033 -0.3299 0.069(4) 1.0000 Uiso  .
H105 H -0.0640 0.6040 -0.3278 0.069(4) 1.0000 Uiso  .
H110 H 0.2848 0.4185 -0.0540 0.069(4) 1.0000 Uiso  .
H111 H 0.4229 0.4630 0.0316 0.069(4) 1.0000 Uiso  .
H112 H 0.4765 0.6205 0.0491 0.069(4) 1.0000 Uiso  .
H113 H 0.3963 0.7840 -0.0169 0.069(4) 1.0000 Uiso  .
H114 H 0.2913 0.7402 -0.0999 0.069(4) 1.0000 Uiso  .
H1151 H -0.1192 0.2875 -0.3644 0.069(4) 1.0000 Uiso  .
H1152 H -0.1400 0.3187 -0.4326 0.069(4) 1.0000 Uiso  .
H1153 H -0.0292 0.2763 -0.4137 0.069(4) 1.0000 Uiso  .
H1161 H 0.0756 0.6612 -0.2600 0.069(4) 1.0000 Uiso  .
H1162 H 0.1412 0.6033 -0.3150 0.069(4) 1.0000 Uiso  .
loop_
_atom_site_aniso_label
_atom_site_aniso_U_11
_atom_site_aniso_U_22
_atom_site_aniso_U_33
_atom_site_aniso_U_23
_atom_site_aniso_U_13
_atom_site_aniso_U_12
Cr1 0.0374(5) 0.0362(6) 0.0431(6) -0.0029(4) 0.0051(4) -0.0050(5) 
Mn1 0.0483(6) 0.0503(6) 0.0416(6) 0.0019(5) -0.0015(4) -0.0022(5) 
O1 0.088(4) 0.075(4) 0.046(3) -0.007(3) -0.017(3) -0.014(3) 
O2 0.087(4) 0.062(4) 0.094(4) -0.017(3) 0.025(3) 0.006(3) 
O3 0.049(4) 0.128(6) 0.178(7) -0.029(5) 0.016(4) -0.039(4) 
O4 0.110(5) 0.148(7) 0.079(4) 0.055(4) 0.035(4) 0.039(5) 
O5 0.107(5) 0.072(4) 0.054(3) 0.020(3) -0.004(3) -0.002(3) 
O6 0.118(5) 0.061(4) 0.116(5) -0.012(4) 0.044(4) 0.012(4) 
O7 0.058(4) 0.218(9) 0.104(5) 0.008(5) -0.010(3) -0.050(5) 
C1 0.046(4) 0.059(5) 0.041(4) -0.007(3) 0.002(3) -0.008(3) 
C2 0.088(6) 0.057(5) 0.047(4) 0.002(4) -0.003(4) -0.026(4) 
C3 0.055(4) 0.061(5) 0.055(4) -0.020(4) -0.001(3) 0.003(4) 
C4 0.074(5) 0.058(5) 0.036(4) -0.005(3) 0.002(3) -0.016(4) 
C5 0.087(6) 0.048(5) 0.049(4) 0.014(3) -0.013(4) -0.020(4) 
C6 0.070(5) 0.072(6) 0.057(5) -0.017(4) -0.005(4) 0.000(4) 
C7 0.061(4) 0.048(4) 0.047(4) -0.004(3) 0.002(3) -0.006(3) 
C8 0.057(4) 0.049(4) 0.047(4) -0.008(3) 0.003(3) -0.009(3) 
C9 0.037(3) 0.043(4) 0.043(3) -0.009(3) 0.006(3) -0.005(3) 
C10 0.051(4) 0.044(4) 0.057(4) -0.016(3) 0.004(3) -0.003(3) 
C11 0.043(4) 0.049(4) 0.052(4) -0.004(3) 0.007(3) 0.012(3) 
C12 0.040(4) 0.074(5) 0.050(4) -0.008(4) 0.002(3) 0.002(4) 
C13 0.050(4) 0.065(5) 0.047(4) -0.012(4) 0.011(3) -0.027(4) 
C14 0.048(4) 0.040(4) 0.044(3) -0.002(3) 0.011(3) -0.012(3) 
C15 0.103(7) 0.103(7) 0.056(5) -0.025(5) -0.025(5) -0.007(6) 
C16 0.054(4) 0.051(4) 0.049(4) -0.004(3) 0.014(3) 0.001(3) 
C17 0.040(4) 0.063(5) 0.087(6) -0.017(4) 0.017(4) -0.013(4) 
C18 0.058(4) 0.062(5) 0.062(5) 0.013(4) 0.020(4) 0.006(4) 
C19 0.056(4) 0.059(5) 0.049(4) -0.009(4) -0.007(3) -0.001(4) 
C20 0.058(5) 0.057(5) 0.083(6) 0.010(4) 0.019(4) -0.002(4) 
C21 0.057(5) 0.117(8) 0.059(5) -0.000(5) 0.003(4) -0.012(5) 
Cr101 0.0408(6) 0.0371(6) 0.0435(6) 0.0015(5) 0.0053(4) -0.0023(5) 
Mn101 0.0442(5) 0.0455(6) 0.0401(6) -0.0041(5) 0.0032(4) -0.0008(5) 
O101 0.064(3) 0.052(3) 0.047(3) 0.000(2) -0.015(2) -0.011(2) 
O102 0.137(6) 0.053(4) 0.101(5) -0.014(3) 0.037(4) 0.022(4) 
O103 0.162(7) 0.162(7) 0.066(4) 0.053(4) 0.045(4) 0.047(6) 
O104 0.053(4) 0.166(8) 0.197(9) 0.006(7) 0.018(4) -0.031(5) 
O105 0.132(5) 0.064(4) 0.060(4) 0.021(3) -0.005(3) -0.005(4) 
O106 0.164(7) 0.057(4) 0.137(6) -0.040(4) 0.064(5) -0.005(4) 
O107 0.061(4) 0.176(8) 0.104(5) -0.028(5) 0.009(3) -0.039(4) 
C101 0.038(3) 0.056(4) 0.042(4) -0.005(3) -0.005(3) -0.001(3) 
C102 0.056(4) 0.059(5) 0.045(4) 0.005(3) -0.006(3) 0.012(3) 
C103 0.048(4) 0.050(4) 0.041(4) -0.007(3) 0.006(3) -0.001(3) 
C104 0.044(3) 0.045(4) 0.035(3) 0.004(3) 0.004(3) -0.002(3) 
C105 0.051(4) 0.047(4) 0.047(4) 0.012(3) -0.006(3) 0.002(3) 
C106 0.057(4) 0.043(4) 0.065(5) 0.000(3) -0.014(3) -0.008(3) 
C107 0.050(4) 0.051(4) 0.047(4) 0.003(3) 0.001(3) -0.011(3) 
C108 0.055(4) 0.051(4) 0.051(4) 0.001(3) -0.004(3) -0.010(3) 
C109 0.036(3) 0.044(4) 0.041(3) -0.003(3) 0.000(3) 0.000(3) 
C110 0.050(4) 0.040(4) 0.047(4) -0.004(3) 0.005(3) 0.003(3) 
C111 0.043(4) 0.056(4) 0.044(4) -0.002(3) 0.001(3) 0.010(3) 
C112 0.041(4) 0.070(5) 0.049(4) -0.008(4) -0.002(3) 0.001(4) 
C113 0.042(4) 0.052(4) 0.059(4) -0.005(3) 0.005(3) -0.011(3) 
C114 0.041(3) 0.042(4) 0.054(4) 0.009(3) 0.006(3) -0.011(3) 
C115 0.075(5) 0.060(5) 0.058(4) -0.011(4) 0.001(4) -0.019(4) 
C116 0.074(5) 0.052(5) 0.055(5) 0.007(4) 0.021(4) 0.010(4) 
C117 0.074(5) 0.075(6) 0.058(5) 0.006(4) 0.017(4) 0.012(5) 
C118 0.057(5) 0.077(6) 0.090(6) -0.006(5) 0.020(4) -0.020(4) 
C119 0.064(5) 0.044(4) 0.047(4) -0.012(3) 0.008(3) -0.002(3) 
C120 0.069(5) 0.046(5) 0.071(5) -0.009(4) 0.023(4) -0.004(4) 
C121 0.055(5) 0.079(6) 0.060(5) -0.001(4) 0.015(4) -0.001(4) 
_refine_ls_extinction_method 
    'None'
loop_
 _geom_bond_atom_site_label_1
 _geom_bond_site_symmetry_1
 _geom_bond_atom_site_label_2
 _geom_bond_site_symmetry_2
 _geom_bond_distance
 _geom_bond_publ_flag
Cr1 . C9 . 2.241(6)    yes
Cr1 . C10 . 2.215(6)    yes
Cr1 . C11 . 2.199(6)    yes
Cr1 . C12 . 2.197(7)    yes
Cr1 . C13 . 2.194(6)    yes
Cr1 . C14 . 2.228(6)    yes
Cr1 . C16 . 1.821(7)    yes
Cr1 . C17 . 1.805(7)    yes
Cr1 . C18 . 1.821(8)    yes
Mn1 . C1 . 2.211(7)    yes
Mn1 . C2 . 2.253(9)    yes
Mn1 . C3 . 2.163(7)    yes
Mn1 . C4 . 2.181(6)    yes
Mn1 . C5 . 2.143(7)    yes
Mn1 . C19 . 1.800(8)    yes
Mn1 . C20 . 1.782(9)    yes
Mn1 . C21 . 1.799(9)    yes
O1 . C4 . 1.361(8)    yes
O1 . C15 . 1.44(1)    yes
O2 . C16 . 1.158(8)    yes
O3 . C17 . 1.154(8)    yes
O4 . C18 . 1.143(9)    yes
O5 . C19 . 1.135(8)    yes
O6 . C20 . 1.143(9)    yes
O7 . C21 . 1.145(9)    yes
C1 . C2 . 1.42(1)    yes
C1 . C6 . 1.47(1)    yes
C1 . C7 . 1.431(9)    yes
C2 . C3 . 1.42(1)    yes
C2 . H2 . 1.085    no
C3 . C4 . 1.40(1)    yes
C3 . H3 . 1.047    no
C4 . C5 . 1.39(1)    yes
C5 . C6 . 1.47(1)    yes
C5 . H5 . 1.051    no
C6 . H61 . 1.024    no
C6 . H62 . 1.124    no
C7 . C8 . 1.168(9)    yes
C8 . C9 . 1.430(9)    yes
C9 . C10 . 1.442(9)    yes
C9 . C14 . 1.395(9)    yes
C10 . C11 . 1.377(9)    yes
C10 . H10 . 1.088    no
C11 . C12 . 1.39(1)    yes
C11 . H11 . 1.075    no
C12 . C13 . 1.41(1)    yes
C12 . H12 . 1.107    no
C13 . C14 . 1.414(9)    yes
C13 . H13 . 0.975    no
C14 . H14 . 1.071    no
C15 . H151 . 0.961    no
C15 . H152 . 0.892    no
C15 . H153 . 0.942    no
Cr101 . C109 . 2.230(6)    yes
Cr101 . C110 . 2.210(6)    yes
Cr101 . C111 . 2.188(6)    yes
Cr101 . C112 . 2.203(7)    yes
Cr101 . C113 . 2.191(6)    yes
Cr101 . C114 . 2.211(6)    yes
Cr101 . C116 . 1.823(8)    yes
Cr101 . C117 . 1.831(8)    yes
Cr101 . C118 . 1.809(8)    yes
Mn101 . C101 . 2.234(6)    yes
Mn101 . C102 . 2.176(7)    yes
Mn101 . C103 . 2.130(6)    yes
Mn101 . C104 . 2.186(6)    yes
Mn101 . C105 . 2.186(6)    yes
Mn101 . C119 . 1.799(8)    yes
Mn101 . C120 . 1.788(8)    yes
Mn101 . C121 . 1.812(8)    yes
O101 . C104 . 1.366(7)    yes
O101 . C115 . 1.435(8)    yes
O102 . C116 . 1.150(8)    yes
O103 . C117 . 1.142(9)    yes
O104 . C118 . 1.17(1)    yes
O105 . C119 . 1.140(8)    yes
O106 . C120 . 1.120(8)    yes
O107 . C121 . 1.138(9)    yes
C101 . C102 . 1.41(1)    yes
C101 . C106 . 1.498(9)    yes
C101 . C107 . 1.430(9)    yes
C102 . C103 . 1.402(9)    yes
C102 . H102 . 1.104    no
C103 . C104 . 1.389(9)    yes
C103 . H103 . 1.000    no
C104 . C105 . 1.397(9)    yes
C105 . C106 . 1.497(9)    yes
C105 . H105 . 1.124    no
C106 . H1161 . 1.022    no
C106 . H1162 . 1.188    no
C107 . C108 . 1.187(9)    yes
C108 . C109 . 1.429(9)    yes
C109 . C110 . 1.418(9)    yes
C109 . C114 . 1.395(9)    yes
C110 . C111 . 1.393(9)    yes
C110 . H110 . 1.052    no
C111 . C112 . 1.41(1)    yes
C111 . H111 . 1.063    no
C112 . C113 . 1.39(1)    yes
C112 . H112 . 1.151    no
C113 . C114 . 1.387(9)    yes
C113 . H113 . 1.152    no
C114 . H114 . 1.022    no
C115 . H1151 . 0.996    no
C115 . H1152 . 1.016    no
C115 . H1153 . 1.065    no
loop_
 _geom_angle_atom_site_label_1
 _geom_angle_site_symmetry_1
 _geom_angle_atom_site_label_2
 _geom_angle_site_symmetry_2
 _geom_angle_atom_site_label_3
 _geom_angle_site_symmetry_3
 _geom_angle
 _geom_angle_publ_flag
C9 . Cr1 . C10 . 37.8(2)    yes
C9 . Cr1 . C11 . 66.9(2)    yes
C10 . Cr1 . C11 . 36.3(2)    yes
C9 . Cr1 . C12 . 79.0(2)    yes
C10 . Cr1 . C12 . 66.0(3)    yes
C11 . Cr1 . C12 . 36.7(3)    yes
C9 . Cr1 . C13 . 66.5(2)    yes
C10 . Cr1 . C13 . 78.5(3)    yes
C11 . Cr1 . C13 . 66.7(3)    yes
C12 . Cr1 . C13 . 37.4(3)    yes
C9 . Cr1 . C14 . 36.4(2)    yes
C10 . Cr1 . C14 . 66.6(3)    yes
C11 . Cr1 . C14 . 78.8(2)    yes
C12 . Cr1 . C14 . 67.2(3)    yes
C13 . Cr1 . C14 . 37.3(2)    yes
C9 . Cr1 . C16 . 124.1(3)    yes
C10 . Cr1 . C16 . 161.0(3)    yes
C11 . Cr1 . C16 . 146.5(3)    yes
C12 . Cr1 . C16 . 110.4(3)    yes
C13 . Cr1 . C16 . 88.1(3)    yes
C9 . Cr1 . C17 . 87.8(3)    yes
C10 . Cr1 . C17 . 94.4(3)    yes
C11 . Cr1 . C17 . 123.8(3)    yes
C12 . Cr1 . C17 . 160.0(3)    yes
C13 . Cr1 . C17 . 146.6(3)    yes
C9 . Cr1 . C18 . 147.1(3)    yes
C10 . Cr1 . C18 . 109.8(3)    yes
C11 . Cr1 . C18 . 87.3(3)    yes
C12 . Cr1 . C18 . 92.7(3)    yes
C13 . Cr1 . C18 . 123.0(3)    yes
C14 . Cr1 . C16 . 94.6(3)    yes
C14 . Cr1 . C17 . 109.9(3)    yes
C16 . Cr1 . C17 . 89.4(3)    yes
C14 . Cr1 . C18 . 159.6(3)    yes
C16 . Cr1 . C18 . 88.7(3)    yes
C17 . Cr1 . C18 . 90.3(4)    yes
C1 . Mn1 . C2 . 37.1(2)    yes
C1 . Mn1 . C3 . 67.7(3)    yes
C2 . Mn1 . C3 . 37.3(3)    yes
C1 . Mn1 . C4 . 78.8(2)    yes
C2 . Mn1 . C4 . 66.5(3)    yes
C3 . Mn1 . C4 . 37.5(3)    yes
C1 . Mn1 . C5 . 66.5(3)    yes
C2 . Mn1 . C5 . 78.7(3)    yes
C3 . Mn1 . C5 . 68.0(3)    yes
C4 . Mn1 . C5 . 37.5(3)    yes
C1 . Mn1 . C19 . 100.5(3)    yes
C2 . Mn1 . C19 . 88.0(3)    yes
C3 . Mn1 . C19 . 103.5(3)    yes
C4 . Mn1 . C19 . 138.7(3)    yes
C5 . Mn1 . C19 . 166.2(3)    yes
C1 . Mn1 . C20 . 92.5(3)    yes
C2 . Mn1 . C20 . 128.1(3)    yes
C3 . Mn1 . C20 . 156.3(3)    yes
C4 . Mn1 . C20 . 128.8(3)    yes
C5 . Mn1 . C20 . 92.7(3)    yes
C1 . Mn1 . C21 . 166.1(3)    yes
C2 . Mn1 . C21 . 138.1(3)    yes
C3 . Mn1 . C21 . 103.1(3)    yes
C4 . Mn1 . C21 . 87.7(3)    yes
C5 . Mn1 . C21 . 100.9(3)    yes
C19 . Mn1 . C20 . 92.4(3)    yes
C19 . Mn1 . C21 . 91.6(4)    yes
C20 . Mn1 . C21 . 93.8(4)    yes
C4 . O1 . C15 . 118.0(6)    yes
Mn1 . C1 . C2 . 73.1(4)    yes
Mn1 . C1 . C6 . 86.7(4)    yes
C2 . C1 . C6 . 119.1(6)    yes
Mn1 . C1 . C7 . 126.0(5)    yes
C2 . C1 . C7 . 118.7(7)    yes
C6 . C1 . C7 . 119.6(6)    yes
Mn1 . C2 . C1 . 69.8(5)    yes
Mn1 . C2 . C3 . 67.9(4)    yes
C1 . C2 . C3 . 118.4(7)    yes
Mn1 . C2 . H2 . 115.057    no
C1 . C2 . H2 . 125.582    no
C3 . C2 . H2 . 112.222    no
Mn1 . C3 . C2 . 74.8(4)    yes
Mn1 . C3 . C4 . 72.0(4)    yes
C2 . C3 . C4 . 119.7(7)    yes
Mn1 . C3 . H3 . 124.869    no
C2 . C3 . H3 . 116.325    no
C4 . C3 . H3 . 123.947    no
Mn1 . C4 . O1 . 124.3(5)    yes
Mn1 . C4 . C3 . 70.6(4)    yes
O1 . C4 . C3 . 123.9(7)    yes
Mn1 . C4 . C5 . 69.8(4)    yes
O1 . C4 . C5 . 115.9(7)    yes
C3 . C4 . C5 . 119.6(6)    yes
Mn1 . C5 . C4 . 72.7(4)    yes
Mn1 . C5 . C6 . 89.2(5)    yes
C4 . C5 . C6 . 119.8(7)    yes
Mn1 . C5 . H5 . 135.403    no
C4 . C5 . H5 . 117.186    no
C6 . C5 . H5 . 115.511    no
C1 . C6 . C5 . 108.2(6)    yes
C1 . C6 . H61 . 119.064    no
C5 . C6 . H61 . 111.641    no
C1 . C6 . H62 . 106.059    no
C5 . C6 . H62 . 109.051    no
H61 . C6 . H62 . 102.163    no
C1 . C7 . C8 . 178.1(7)    yes
C7 . C8 . C9 . 173.7(7)    yes
Cr1 . C9 . C8 . 132.5(4)    yes
Cr1 . C9 . C10 . 70.1(4)    yes
C8 . C9 . C10 . 119.5(6)    yes
Cr1 . C9 . C14 . 71.3(3)    yes
C8 . C9 . C14 . 121.8(6)    yes
C10 . C9 . C14 . 118.6(6)    yes
Cr1 . C10 . C9 . 72.1(4)    yes
Cr1 . C10 . C11 . 71.2(4)    yes
C9 . C10 . C11 . 120.6(6)    yes
Cr1 . C10 . H10 . 128.568    no
C9 . C10 . H10 . 117.525    no
C11 . C10 . H10 . 121.897    no
Cr1 . C11 . C10 . 72.4(4)    yes
Cr1 . C11 . C12 . 71.5(4)    yes
C10 . C11 . C12 . 120.9(6)    yes
Cr1 . C11 . H11 . 126.844    no
C10 . C11 . H11 . 116.897    no
C12 . C11 . H11 . 122.185    no
Cr1 . C12 . C11 . 71.7(4)    yes
Cr1 . C12 . C13 . 71.2(4)    yes
C11 . C12 . C13 . 119.7(6)    yes
Cr1 . C12 . H12 . 130.729    no
C11 . C12 . H12 . 117.421    no
C13 . C12 . H12 . 122.857    no
Cr1 . C13 . C12 . 71.4(4)    yes
Cr1 . C13 . C14 . 72.6(3)    yes
C12 . C13 . C14 . 120.4(6)    yes
Cr1 . C13 . H13 . 124.703    no
C12 . C13 . H13 . 115.673    no
C14 . C13 . H13 . 123.815    no
Cr1 . C14 . C9 . 72.3(4)    yes
Cr1 . C14 . C13 . 70.1(4)    yes
C9 . C14 . C13 . 119.9(6)    yes
Cr1 . C14 . H14 . 117.037    no
C9 . C14 . H14 . 118.058    no
C13 . C14 . H14 . 120.380    no
O1 . C15 . H151 . 101.835    no
O1 . C15 . H152 . 111.874    no
H151 . C15 . H152 . 124.609    no
O1 . C15 . H153 . 116.880    no
H151 . C15 . H153 . 106.098    no
H152 . C15 . H153 . 96.374    no
Cr1 . C16 . O2 . 178.1(6)    yes
Cr1 . C17 . O3 . 178.8(8)    yes
Cr1 . C18 . O4 . 177.5(8)    yes
Mn1 . C19 . O5 . 177.6(7)    yes
Mn1 . C20 . O6 . 177.9(8)    yes
Mn1 . C21 . O7 . 179.4(10)    yes
C109 . Cr101 . C110 . 37.2(2)    yes
C109 . Cr101 . C111 . 66.7(2)    yes
C110 . Cr101 . C111 . 36.9(2)    yes
C109 . Cr101 . C112 . 78.7(2)    yes
C110 . Cr101 . C112 . 67.0(3)    yes
C111 . Cr101 . C112 . 37.4(3)    yes
C109 . Cr101 . C113 . 66.2(2)    yes
C110 . Cr101 . C113 . 78.9(3)    yes
C111 . Cr101 . C113 . 66.9(3)    yes
C112 . Cr101 . C113 . 37.0(3)    yes
C109 . Cr101 . C114 . 36.6(2)    yes
C110 . Cr101 . C114 . 66.7(2)    yes
C111 . Cr101 . C114 . 78.7(2)    yes
C112 . Cr101 . C114 . 66.5(2)    yes
C113 . Cr101 . C114 . 36.7(2)    yes
C109 . Cr101 . C116 . 127.2(3)    yes
C110 . Cr101 . C116 . 163.5(3)    yes
C111 . Cr101 . C116 . 145.0(3)    yes
C112 . Cr101 . C116 . 108.8(3)    yes
C113 . Cr101 . C116 . 88.7(3)    yes
C109 . Cr101 . C117 . 144.0(3)    yes
C110 . Cr101 . C117 . 107.7(3)    yes
C111 . Cr101 . C117 . 86.9(3)    yes
C112 . Cr101 . C117 . 95.3(3)    yes
C113 . Cr101 . C117 . 126.6(3)    yes
C109 . Cr101 . C118 . 87.5(3)    yes
C110 . Cr101 . C118 . 96.1(3)    yes
C111 . Cr101 . C118 . 127.4(3)    yes
C112 . Cr101 . C118 . 163.0(3)    yes
C113 . Cr101 . C118 . 142.9(3)    yes
C114 . Cr101 . C116 . 96.9(3)    yes
C114 . Cr101 . C117 . 161.8(3)    yes
C116 . Cr101 . C117 . 88.4(3)    yes
C114 . Cr101 . C118 . 107.4(3)    yes
C116 . Cr101 . C118 . 87.3(4)    yes
C117 . Cr101 . C118 . 90.1(4)    yes
C101 . Mn101 . C102 . 37.2(3)    yes
C101 . Mn101 . C103 . 68.0(2)    yes
C102 . Mn101 . C103 . 38.0(2)    yes
C101 . Mn101 . C104 . 78.0(2)    yes
C102 . Mn101 . C104 . 66.7(2)    yes
C103 . Mn101 . C104 . 37.5(2)    yes
C101 . Mn101 . C105 . 65.1(2)    yes
C102 . Mn101 . C105 . 78.4(3)    yes
C103 . Mn101 . C105 . 67.9(3)    yes
C104 . Mn101 . C105 . 37.3(2)    yes
C101 . Mn101 . C119 . 102.7(3)    yes
C102 . Mn101 . C119 . 89.8(3)    yes
C103 . Mn101 . C119 . 105.2(3)    yes
C104 . Mn101 . C119 . 140.4(3)    yes
C105 . Mn101 . C119 . 167.3(3)    yes
C101 . Mn101 . C120 . 90.7(3)    yes
C102 . Mn101 . C120 . 126.5(3)    yes
C103 . Mn101 . C120 . 154.3(3)    yes
C104 . Mn101 . C120 . 126.7(3)    yes
C105 . Mn101 . C120 . 90.7(3)    yes
C101 . Mn101 . C121 . 166.2(3)    yes
C102 . Mn101 . C121 . 139.5(3)    yes
C103 . Mn101 . C121 . 103.8(3)    yes
C104 . Mn101 . C121 . 88.8(3)    yes
C105 . Mn101 . C121 . 101.8(3)    yes
C119 . Mn101 . C120 . 92.9(3)    yes
C119 . Mn101 . C121 . 90.0(3)    yes
C120 . Mn101 . C121 . 94.0(3)    yes
C104 . O101 . C115 . 116.3(5)    yes
Mn101 . C101 . C102 . 69.2(4)    yes
Mn101 . C101 . C106 . 91.0(4)    yes
C102 . C101 . C106 . 117.8(6)    yes
Mn101 . C101 . C107 . 125.8(5)    yes
C102 . C101 . C107 . 118.5(6)    yes
C106 . C101 . C107 . 120.5(6)    yes
Mn101 . C102 . C101 . 73.6(4)    yes
Mn101 . C102 . C103 . 69.2(4)    yes
C101 . C102 . C103 . 120.6(6)    yes
Mn101 . C102 . H102 . 124.557    no
C101 . C102 . H102 . 116.550    no
C103 . C102 . H102 . 122.547    no
Mn101 . C103 . C102 . 72.8(4)    yes
Mn101 . C103 . C104 . 73.4(4)    yes
C102 . C103 . C104 . 118.5(6)    yes
Mn101 . C103 . H103 . 139.861    no
C102 . C103 . H103 . 124.981    no
C104 . C103 . H103 . 114.063    no
Mn101 . C104 . O101 . 125.1(4)    yes
Mn101 . C104 . C103 . 69.0(3)    yes
O101 . C104 . C103 . 124.6(6)    yes
Mn101 . C104 . C105 . 71.4(4)    yes
O101 . C104 . C105 . 115.0(5)    yes
C103 . C104 . C105 . 119.8(6)    yes
Mn101 . C105 . C104 . 71.4(3)    yes
Mn101 . C105 . C106 . 92.9(4)    yes
C104 . C105 . C106 . 118.2(6)    yes
Mn101 . C105 . H105 . 114.900    no
C104 . C105 . H105 . 120.517    no
C106 . C105 . H105 . 120.286    no
C101 . C106 . C105 . 105.2(5)    yes
C101 . C106 . H1161 . 109.705    no
C105 . C106 . H1161 . 116.078    no
C101 . C106 . H1162 . 105.554    no
C105 . C106 . H1162 . 115.887    no
H1161 . C106 . H1162 . 103.970    no
C101 . C107 . C108 . 177.8(7)    yes
C107 . C108 . C109 . 175.4(8)    yes
Cr101 . C109 . C108 . 130.4(5)    yes
Cr101 . C109 . C110 . 70.6(4)    yes
C108 . C109 . C110 . 118.6(6)    yes
Cr101 . C109 . C114 . 70.9(4)    yes
C108 . C109 . C114 . 122.0(6)    yes
C110 . C109 . C114 . 119.4(6)    yes
Cr101 . C110 . C109 . 72.2(4)    yes
Cr101 . C110 . C111 . 70.7(4)    yes
C109 . C110 . C111 . 119.5(6)    yes
Cr101 . C110 . H110 . 124.485    no
C109 . C110 . H110 . 118.978    no
C111 . C110 . H110 . 121.301    no
Cr101 . C111 . C110 . 72.4(4)    yes
Cr101 . C111 . C112 . 71.9(4)    yes
C110 . C111 . C112 . 120.7(6)    yes
Cr101 . C111 . H111 . 137.169    no
C110 . C111 . H111 . 134.050    no
C112 . C111 . H111 . 103.955    no
Cr101 . C112 . C111 . 70.7(4)    yes
Cr101 . C112 . C113 . 71.0(4)    yes
C111 . C112 . C113 . 118.9(6)    yes
Cr101 . C112 . H112 . 138.800    no
C111 . C112 . H112 . 116.455    no
C113 . C112 . H112 . 123.816    no
Cr101 . C113 . C112 . 71.9(4)    yes
Cr101 . C113 . C114 . 72.4(4)    yes
C112 . C113 . C114 . 120.9(6)    yes
Cr101 . C113 . H113 . 122.608    no
C112 . C113 . H113 . 126.335    no
C114 . C113 . H113 . 112.436    no
Cr101 . C114 . C109 . 72.5(4)    yes
Cr101 . C114 . C113 . 70.9(4)    yes
C109 . C114 . C113 . 120.5(6)    yes
Cr101 . C114 . H114 . 125.717    no
C109 . C114 . H114 . 119.917    no
C113 . C114 . H114 . 119.482    no
O101 . C115 . H1151 . 106.337    no
O101 . C115 . H1152 . 104.097    no
H1151 . C115 . H1152 . 98.433    no
O101 . C115 . H1153 . 114.514    no
H1151 . C115 . H1153 . 117.716    no
H1152 . C115 . H1153 . 113.778    no
Cr101 . C116 . O102 . 178.6(7)    yes
Cr101 . C117 . O103 . 177.8(9)    yes
Cr101 . C118 . O104 . 177.6(9)    yes
Mn101 . C119 . O105 . 177.1(7)    yes
Mn101 . C120 . O106 . 178.6(8)    yes
Mn101 . C121 . O107 . 179.0(8)    yes
#===END
#========================================
C21 H12 B1 Cr1 F4 Mn1 O7
#==========================================
_chemical_melting_point                   ?              
                                                                                
_refine_ls_matrix_type                      'full'
                                                                                
_atom_sites_solution_primary                'direct'
                                                                                
_atom_sites_solution_secondary              'difmap'
_atom_sites_solution_hydrogens              'geom'
                                                                                
_refine_ls_hydrogen_treatment               'refU'
_publ_section_exptl_refinement                                                  
;                                                                               
 H atoms placed geometrically after each cycle,
one overall isotropic thermal parameter refined. 
;                                                                               
_computing_structure_refinement 
; 
 CRYSTALS (Watkin et al 2001) 
; 
_computing_publication_material 
; 
 CRYSTALS (Watkin et al 2001) 
; 
_computing_molecular_graphics 
; 
 CAMERON (Watkin et al 1996) 
; 
#============================================================= 
 
_cell_length_a                    12.338(2)
_cell_angle_alpha                 90
_cell_length_b                    12.704(4)
_cell_angle_beta                  90
_cell_length_c                    14.557(3)
_cell_angle_gamma                 90
_cell_volume                      2281.8(9)
 
_symmetry_cell_setting            'Orthorhombic' 
_symmetry_space_group_name_H-M    'P 21 c n ' 
loop_
 _symmetry_equiv_pos_as_xyz
 'x,y,z'
 'x+1/2,-y,-z'
 'x,-y+1/2,z+1/2'
 'x+1/2,y+1/2,-z+1/2'
 

_chemical_absolute_configuration  'unk' 
 
loop_
_atom_type_symbol
_atom_type_scat_dispersion_real
_atom_type_scat_dispersion_imag
_atom_type_scat_Cromer_Mann_a1
_atom_type_scat_Cromer_Mann_b1
_atom_type_scat_Cromer_Mann_a2
_atom_type_scat_Cromer_Mann_b2
_atom_type_scat_Cromer_Mann_a3
_atom_type_scat_Cromer_Mann_b3
_atom_type_scat_Cromer_Mann_a4
_atom_type_scat_Cromer_Mann_b4
_atom_type_scat_Cromer_Mann_c
_atom_type_scat_source  
 'C   '    0.0033    0.0016    2.3100   20.8439
    1.0200   10.2075    1.5886    0.5687    0.8650   51.6512    0.2156
'International_Tables_Vol_IV_Table_2.2B'
 'H   '    0.0000    0.0000    0.4930   10.5109
    0.3229   26.1257    0.1402    3.1424    0.0408   57.7998    0.0030
'International_Tables_Vol_IV_Table_2.2B'
 'B   '    0.0013    0.0007    2.0545   23.2185
    1.3326    1.0210    1.0979   60.3498    0.7068    0.1403   -0.1932
'International_Tables_Vol_IV_Table_2.2B'
 'F   '    0.0171    0.0103    3.5392   10.2825
    2.6412    4.2944    1.5170    0.2615    1.0243   26.1476    0.2776
'International_Tables_Vol_IV_Table_2.2B'
 'Cr  '    0.3209    0.6236   10.6406    6.1038
    7.3537    0.3920    3.3240   20.2626    1.4922   98.7399    1.1832
'International_Tables_Vol_IV_Table_2.2B'
 'Mn  '    0.3368    0.7283   11.2819    5.3409
    7.3573    0.3432    3.0193   17.8674    2.2441   83.7543    1.0896
'International_Tables_Vol_IV_Table_2.2B'
 'O   '    0.0106    0.0060    3.0485   13.2771
    2.2868    5.7011    1.5463    0.3239    0.8670   32.9089    0.2508
'International_Tables_Vol_IV_Table_2.2B'
 
 
_cell_formula_units_Z                    4
_chemical_formula_sum             ' C21 H12 B1 Cr1 F4 Mn1 O7 '
_chemical_formula_moiety          ' C21 H12 Cr1 Mn1 O7  1+, B1 F4  1-'
_chemical_compound_source
;
?
;
_chemical_formula_weight            570.05
 
 
_cell_measurement_reflns_used           25
_cell_measurement_theta_min             14
_cell_measurement_theta_max             14.3
_cell_measurement_temperature          295
 
_exptl_crystal_description        ' stick ' 
_exptl_crystal_colour             ' red ' 
_exptl_crystal_size_min           0.20 
_exptl_crystal_size_mid           0.20 
_exptl_crystal_size_max           0.45 
 
_exptl_crystal_density_diffrn     1.659 
_exptl_crystal_density_meas       ? 
_exptl_crystal_F_000              1136.000 
_exptl_absorpt_coefficient_mu     1.102 

 
_diffrn_measurement_device_type 
; 
Enraf-Nonius Mach3 
; 
_diffrn_radiation_monochromator   graphite 
_computing_data_collection 
; 
 Cad4 Express, (Enraf-Nonius, 1989) 
; 
_computing_data_reduction 
; 
 RC93 (Watkin, Prout & Lilley, 1994) 
; 
_computing_cell_refinement 
; 
 Cad4 Express, (Enraf-Nonius, 1989) 
; 
_computing_structure_solution 
; 
 SHELXS 86 (Sheldrick, 1986) 
; 
_diffrn_measurement_method        \w/2\q 
_exptl_absorpt_correction_type    'refdelf' 
_exptl_absorpt_process_details 
; 
 DIFABS (Walker & Stuart, 1983) 
; 
_exptl_absorpt_correction_T_min   0.73 
_exptl_absorpt_correction_T_max   0.80 
 
_diffrn_standards_interval_time   3600 
_diffrn_standards_interval_count  0 
_diffrn_standards_number          2 
_diffrn_standards_decay_%         4.97 
 
_diffrn_ambient_temperature        295
_diffrn_reflns_number             2556 
_reflns_number_total              2340 
_diffrn_reflns_av_R_equivalents   0.00 

_diffrn_reflns_theta_min          2.128 
_diffrn_reflns_theta_max          25.968 
_diffrn_measured_fraction_theta_max 1.000 
 
_diffrn_reflns_theta_full         25.968 
_diffrn_measured_fraction_theta_full 1.000 
 
 
_diffrn_reflns_limit_h_min        0 
_diffrn_reflns_limit_h_max        15 
_diffrn_reflns_limit_k_min        0 
_diffrn_reflns_limit_k_max        15 
_diffrn_reflns_limit_l_min        0 
_diffrn_reflns_limit_l_max        17 
_reflns_limit_h_min               0 
_reflns_limit_h_max               15 
_reflns_limit_k_min               0 
_reflns_limit_k_max               15 
_reflns_limit_l_min               0 
_reflns_limit_l_max               17 
 
 
_refine_diff_density_min          -0.50 
_refine_diff_density_max          0.55 
 
 
_refine_ls_number_reflns          1746 
_refine_ls_number_parameters      318 
 
_refine_ls_R_factor_ref           0.0558 
_refine_ls_wR_factor_ref          0.0644 
_refine_ls_goodness_of_fit_ref    1.0964 
 
_reflns_number_all                2340 
_refine_ls_R_factor_all           0.0847 
_refine_ls_wR_factor_all          0.0741 
 
# The I/u(I) cutoff below was used for refinement as 
# well as the _gt R-factors:
_reflns_threshold_expression      I>1.50u(I)
_reflns_number_gt                 1746 
_refine_ls_R_factor_gt            0.0558 
_refine_ls_wR_factor_gt           0.0644 
 
 
_refine_ls_shift/su_max           0.000346 
_refine_ls_structure_factor_coef  'F' 
_refine_ls_weighting_scheme       'calc' 
_refine_ls_weighting_details 
;
Method = Prince modified Chebychev polynomial, (Watkin, 1994) 
 W = [weight] * [1-(deltaF/6*sigmaF)^2]^2 
 
 8.93 -1.11 6.93 
;
_diffrn_radiation_type            'Mo K\a'
_diffrn_radiation_wavelength           0.71073
 
_publ_section_references 
; 
 
 
Enraf-Nonius, (1989) Cad4 Express. 
 
 
Sheldrick, G.M. (1986). SHELXS86. Program for the solution of 
crystal structures. Univ. of Gottingen, Federal Republic of Germany. 
 
 
Walker, N., and Stuart, D. Acta Cryst, (1983) A39, 158-166 
 
 
Watkin D.J. (1994), 
Acta Cryst, A50, 411-437 
Prince, E. 
Mathematical Techniques in Crystallography 
and Materials Science 
Springer-Verlag, New York, 1982. 
 
 
Watkin, D.J., Prout, C.K., Carruthers, J.R., Betteridge, P.W. & Cooper 
R.I. (2001) CRYSTALS 
Issue 11. Chemical Crystallography Laboratory, OXFORD, UK. 
 
 
Watkin, D.J., Prout, C.K. & Pearce, L.J. (1996) CAMERON, Chemical 
Crystallography Laboratory, OXFORD, UK. 
 
 
Watkin, D.J., Prout, C.K., Lilley, P.M.deQ. (1994), RC93, Chemical 
Crystallography Laboratory, Oxford, UK. 
; 


loop_
_atom_site_label
_atom_site_type_symbol
_atom_site_fract_x
_atom_site_fract_y
_atom_site_fract_z
_atom_site_U_iso_or_equiv
_atom_site_occupancy
_atom_site_adp_type
_atom_site_attached_hydrogens
Cr1 Cr 0.1295(4) 0.85458(11) 0.49830(9) 0.0535 1.0000 Uani  .
Mn1 Mn 0.6156(4) 0.79510(8) 0.17516(7) 0.0398 1.0000 Uani  .
O1 O 0.8495(5) 0.9141(5) 0.2066(5) 0.0619 1.0000 Uani  .
O2 O 0.7863(8) 0.6968(9) 0.0649(8) 0.1162 1.0000 Uani  .
O3 O 0.4879(8) 0.8292(7) 0.0070(5) 0.0822 1.0000 Uani  .
O4 O 0.5138(9) 0.5879(7) 0.2001(6) 0.1015 1.0000 Uani  .
O5 O 0.3147(16) 0.934(3) 0.601(2) 0.4177 1.0000 Uani  .
O6 O 0.0622(14) 1.0790(7) 0.5005(6) 0.1302 1.0000 Uani  .
O7 O 0.017(2) 0.831(1) 0.6784(8) 0.1985 1.0000 Uani  .
C1 C 0.5312(8) 0.8641(8) 0.2928(6) 0.0466 1.0000 Uani  .
C2 C 0.5539(8) 0.9427(8) 0.2261(7) 0.0480 1.0000 Uani  .
C3 C 0.6591(8) 0.9598(8) 0.1947(7) 0.0538 1.0000 Uani  .
C4 C 0.7454(8) 0.9034(8) 0.2302(6) 0.0496 1.0000 Uani  .
C5 C 0.7243(8) 0.8198(8) 0.2914(7) 0.0486 1.0000 Uani  .
C6 C 0.6213(11) 0.8021(7) 0.3240(5) 0.0523 1.0000 Uani  .
C7 C 0.4235(8) 0.8423(8) 0.3219(7) 0.0554 1.0000 Uani  .
C8 C 0.3349(9) 0.8226(8) 0.3514(7) 0.0600 1.0000 Uani  .
C9 C 0.2284(8) 0.7951(9) 0.3819(8) 0.0535 1.0000 Uani  .
C10 C 0.139(1) 0.8529(8) 0.3465(7) 0.0615 1.0000 Uani  .
C11 C 0.0345(9) 0.821(1) 0.3737(8) 0.0610 1.0000 Uani  .
C12 C 0.0166(11) 0.7406(13) 0.435(1) 0.0789 1.0000 Uani  .
C13 C 0.1054(12) 0.6854(8) 0.4706(8) 0.0720 1.0000 Uani  .
C14 C 0.211(1) 0.7144(9) 0.4460(9) 0.0613 1.0000 Uani  .
C15 C 0.876(1) 0.993(1) 0.1381(9) 0.0737 1.0000 Uani  .
C16 C 0.7222(9) 0.7337(9) 0.1064(7) 0.0642 1.0000 Uani  .
C17 C 0.5366(8) 0.8177(7) 0.0734(6) 0.0538 1.0000 Uani  .
C18 C 0.555(1) 0.6682(8) 0.1894(8) 0.0643 1.0000 Uani  .
C19 C 0.2397(18) 0.899(3) 0.5634(18) 0.2227 1.0000 Uani  .
C20 C 0.0848(11) 0.990(1) 0.5009(7) 0.0726 1.0000 Uani  .
C21 C 0.0594(17) 0.841(1) 0.6088(9) 0.1037 1.0000 Uani  .
B1 B 0.755(1) 0.9620(9) 0.8803(9) 0.0594 1.0000 Uani  .
F1 F 0.7921(18) 0.920(1) 0.8047(11) 0.2330 1.0000 Uani  .
F2 F 0.6645(12) 0.993(2) 0.8602(18) 0.2890 1.0000 Uani  .
F3 F 0.7375(16) 0.8906(17) 0.9414(9) 0.2562 1.0000 Uani  .
F4 F 0.8203(12) 1.0392(12) 0.903(1) 0.2146 1.0000 Uani  .
H21 H 0.4928 0.9858 0.2010 0.107(13) 1.0000 Uiso  .
H31 H 0.6720 1.0139 0.1457 0.107(13) 1.0000 Uiso  .
H51 H 0.7850 0.7731 0.3109 0.107(13) 1.0000 Uiso  .
H61 H 0.6090 0.7450 0.3703 0.107(13) 1.0000 Uiso  .
H101 H 0.1499 0.9134 0.3037 0.107(13) 1.0000 Uiso  .
H111 H -0.0294 0.8581 0.3465 0.107(13) 1.0000 Uiso  .
H121 H -0.0594 0.7216 0.4541 0.107(13) 1.0000 Uiso  .
H131 H 0.0938 0.6253 0.5138 0.107(13) 1.0000 Uiso  .
H141 H 0.2731 0.6776 0.4736 0.107(13) 1.0000 Uiso  .
H151 H 0.9557 0.9930 0.1268 0.107(13) 1.0000 Uiso  .
H152 H 0.8369 0.9772 0.0795 0.107(13) 1.0000 Uiso  .
H153 H 0.8531 1.0642 0.1609 0.107(13) 1.0000 Uiso  .
loop_
_atom_site_aniso_label
_atom_site_aniso_U_11
_atom_site_aniso_U_22
_atom_site_aniso_U_33
_atom_site_aniso_U_23
_atom_site_aniso_U_13
_atom_site_aniso_U_12
Cr1 0.0481(7) 0.0596(7) 0.0528(7) -0.0128(6) -0.0010(8) 0.0062(9) 
Mn1 0.0408(5) 0.0386(5) 0.0400(5) 0.0004(5) 0.0003(7) -0.0017(7) 
O1 0.049(4) 0.061(4) 0.075(4) 0.011(4) -0.007(3) -0.011(3) 
O2 0.083(6) 0.130(8) 0.136(9) -0.042(7) 0.041(6) 0.028(6) 
O3 0.099(6) 0.099(6) 0.048(4) -0.006(4) -0.013(4) 0.028(5) 
O4 0.132(8) 0.083(6) 0.089(6) 0.008(5) 0.007(6) -0.057(6) 
O5 0.159(17) 0.66(7) 0.43(4) -0.44(5) -0.17(2) 0.14(3) 
O6 0.250(16) 0.063(5) 0.077(6) -0.008(4) 0.007(7) 0.031(7) 
O7 0.40(3) 0.113(8) 0.082(7) -0.003(6) 0.102(12) -0.024(14) 
C1 0.045(5) 0.053(5) 0.042(5) -0.012(4) 0.001(4) -0.001(4) 
C2 0.049(5) 0.042(5) 0.054(6) -0.012(4) -0.015(5) 0.010(4) 
C3 0.062(6) 0.041(5) 0.059(6) 0.009(4) -0.014(4) -0.009(4) 
C4 0.060(6) 0.044(5) 0.045(5) 0.001(4) -0.008(4) -0.014(4) 
C5 0.046(5) 0.051(6) 0.049(5) 0.008(4) -0.003(4) 0.007(4) 
C6 0.046(4) 0.067(5) 0.044(3) 0.009(4) -0.015(5) 0.007(6) 
C7 0.047(5) 0.065(6) 0.054(5) -0.005(5) 0.007(4) 0.004(4) 
C8 0.064(6) 0.059(5) 0.058(5) -0.006(4) 0.007(5) 0.005(5) 
C9 0.042(5) 0.062(6) 0.056(6) -0.008(5) 0.005(4) 0.009(5) 
C10 0.063(7) 0.065(6) 0.056(5) 0.002(4) 0.006(5) 0.003(5) 
C11 0.050(6) 0.080(7) 0.053(6) -0.016(6) -0.008(5) 0.010(6) 
C12 0.065(7) 0.10(1) 0.073(9) -0.039(8) 0.016(6) -0.035(8) 
C13 0.074(8) 0.065(6) 0.076(6) -0.014(5) 0.022(7) -0.010(7) 
C14 0.065(6) 0.045(5) 0.073(7) 0.003(5) 0.019(6) 0.016(5) 
C15 0.063(6) 0.078(7) 0.080(7) 0.014(6) 0.001(6) -0.019(6) 
C16 0.055(6) 0.072(7) 0.066(6) -0.013(5) 0.008(5) 0.005(5) 
C17 0.054(5) 0.065(6) 0.043(5) -0.010(4) 0.002(4) 0.002(5)

C18 0.068(7) 0.056(5) 0.069(7) 0.004(5) 0.005(5) -0.018(5) 
C19 0.102(13) 0.37(4) 0.20(2) -0.21(3) -0.057(15) 0.09(2) 
C20 0.104(9) 0.068(6) 0.046(5) -0.009(4) 0.011(5) 0.000(6) 
C21 0.175(16) 0.069(7) 0.068(8) -0.006(6) 0.035(9) -0.009(9) 
B1 0.061(7) 0.048(6) 0.069(7) -0.007(5) 0.005(6) -0.005(5) 
F1 0.36(3) 0.119(9) 0.216(14) -0.069(9) 0.134(16) -0.070(13) 
F2 0.122(12) 0.40(3) 0.34(2) 0.06(2) -0.056(13) 0.038(16) 
F3 0.29(2) 0.35(2) 0.13(1) 0.118(12) -0.055(11) -0.205(19) 
F4 0.220(14) 0.222(13) 0.202(14) -0.096(11) 0.077(12) -0.165(12) 
_refine_ls_extinction_method 
    'None'
loop_
 _geom_bond_atom_site_label_1
 _geom_bond_site_symmetry_1
 _geom_bond_atom_site_label_2
 _geom_bond_site_symmetry_2
 _geom_bond_distance
 _geom_bond_publ_flag
Cr1 . C9 . 2.221(11)    yes
Cr1 . C10 . 2.21(1)    yes
Cr1 . C11 . 2.202(12)    yes
Cr1 . C12 . 2.213(12)    yes
Cr1 . C13 . 2.207(11)    yes
Cr1 . C14 . 2.181(11)    yes
Cr1 . C19 . 1.75(2)    yes
Cr1 . C20 . 1.805(12)    yes
Cr1 . C21 . 1.835(14)    yes
Mn1 . C1 . 2.188(9)    yes
Mn1 . C2 . 2.155(9)    yes
Mn1 . C3 . 2.18(1)    yes
Mn1 . C4 . 2.26(1)    yes
Mn1 . C5 . 2.18(1)    yes
Mn1 . C6 . 2.169(7)    yes
Mn1 . C16 . 1.828(11)    yes
Mn1 . C17 . 1.80(1)    yes
Mn1 . C18 . 1.788(11)    yes
O1 . C4 . 1.336(12)    yes
O1 . C15 . 1.454(14)    yes
O2 . C16 . 1.099(12)    yes
O3 . C17 . 1.147(11)    yes
O4 . C18 . 1.151(12)    yes
O5 . C19 . 1.17(3)    yes
O6 . C20 . 1.167(15)    yes
O7 . C21 . 1.148(17)    yes
C1 . C2 . 1.421(15)    yes
C1 . C6 . 1.436(16)    yes
C1 . C7 . 1.421(13)    yes
C2 . C3 . 1.393(15)    yes
C2 . H21 . 1.002    no
C3 . C4 . 1.384(14)    yes
C3 . H31 . 1.003    no
C4 . C5 . 1.411(14)    yes
C5 . C6 . 1.376(17)    yes
C5 . H51 . 0.997    no
C6 . H61 . 1.002    no
C7 . C8 . 1.201(13)    yes
C8 . C9 . 1.430(15)    yes
C9 . C10 . 1.422(15)    yes
C9 . C14 . 1.404(16)    yes
C10 . C11 . 1.408(17)    yes
C10 . H101 . 0.999    no
C11 . C12 . 1.37(2)    yes
C11 . H111 . 1.001    no
C12 . C13 . 1.40(2)    yes
C12 . H121 . 1.008    no
C13 . C14 . 1.396(18)    yes
C13 . H131 . 0.999    no
C14 . H141 . 0.987    no
C15 . H151 . 0.999    no
C15 . H152 . 1.002    no
C15 . H153 . 0.998    no
B1 . F1 . 1.304(18)    yes
B1 . F2 . 1.224(18)    yes
B1 . F3 . 1.289(18)    yes
B1 . F4 . 1.309(15)    yes
loop_
 _geom_angle_atom_site_label_1
 _geom_angle_site_symmetry_1
 _geom_angle_atom_site_label_2
 _geom_angle_site_symmetry_2
 _geom_angle_atom_site_label_3
 _geom_angle_site_symmetry_3
 _geom_angle
 _geom_angle_publ_flag
C9 . Cr1 . C10 . 37.4(4)    yes
C9 . Cr1 . C11 . 66.3(4)    yes
C10 . Cr1 . C11 . 37.2(5)    yes
C9 . Cr1 . C12 . 78.7(4)    yes
C10 . Cr1 . C12 . 67.0(5)    yes
C11 . Cr1 . C12 . 36.2(5)    yes
C9 . Cr1 . C13 . 66.6(4)    yes
C10 . Cr1 . C13 . 79.4(4)    yes
C11 . Cr1 . C13 . 65.7(5)    yes
C12 . Cr1 . C13 . 37.0(6)    yes
C9 . Cr1 . C14 . 37.2(4)    yes
C10 . Cr1 . C14 . 67.6(5)    yes
C11 . Cr1 . C14 . 78.3(5)    yes
C12 . Cr1 . C14 . 66.9(5)    yes
C13 . Cr1 . C14 . 37.1(5)    yes
C9 . Cr1 . C19 . 95.5(8)    yes
C10 . Cr1 . C19 . 120.2(11)    yes
C11 . Cr1 . C19 . 157.2(12)    yes
C12 . Cr1 . C19 . 157.8(13)    yes
C13 . Cr1 . C19 . 121.1(12)    yes
C9 . Cr1 . C20 . 120.5(5)    yes
C10 . Cr1 . C20 . 92.6(4)    yes
C11 . Cr1 . C20 . 92.3(5)    yes
C12 . Cr1 . C20 . 116.1(7)    yes
C13 . Cr1 . C20 . 152.8(6)    yes
C9 . Cr1 . C21 . 153.6(5)    yes
C10 . Cr1 . C21 . 154.1(7)    yes
C11 . Cr1 . C21 . 116.9(8)    yes
C12 . Cr1 . C21 . 90.5(7)    yes
C13 . Cr1 . C21 . 90.2(5)    yes
C14 . Cr1 . C19 . 95.4(9)    yes
C14 . Cr1 . C20 . 157.7(5)    yes
C19 . Cr1 . C20 . 85.4(11)    yes
C14 . Cr1 . C21 . 116.4(6)    yes
C19 . Cr1 . C21 . 85.5(13)    yes
C20 . Cr1 . C21 . 85.9(6)    yes
C1 . Mn1 . C2 . 38.2(4)    yes
C1 . Mn1 . C3 . 68.3(4)    yes
C2 . Mn1 . C3 . 37.5(4)    yes
C1 . Mn1 . C4 . 79.4(4)    yes
C2 . Mn1 . C4 . 66.3(4)    yes
C3 . Mn1 . C4 . 36.3(4)    yes
C1 . Mn1 . C5 . 68.1(3)    yes
C2 . Mn1 . C5 . 79.9(3)    yes
C3 . Mn1 . C5 . 67.0(4)    yes
C4 . Mn1 . C5 . 37.0(4)    yes
C1 . Mn1 . C6 . 38.5(4)    yes
C2 . Mn1 . C6 . 68.4(4)    yes
C3 . Mn1 . C6 . 79.8(4)    yes
C4 . Mn1 . C6 . 66.3(4)    yes
C5 . Mn1 . C6 . 36.8(5)    yes
C1 . Mn1 . C16 . 160.4(5)    yes
C2 . Mn1 . C16 . 144.4(5)    yes
C3 . Mn1 . C16 . 107.7(5)    yes
C4 . Mn1 . C16 . 86.7(5)    yes
C5 . Mn1 . C16 . 92.5(5)    yes
C1 . Mn1 . C17 . 108.9(5)    yes
C2 . Mn1 . C17 . 87.3(4)    yes
C3 . Mn1 . C17 . 95.0(4)    yes
C4 . Mn1 . C17 . 125.4(4)    yes

C5 . Mn1 . C17 . 161.8(4)    yes
C1 . Mn1 . C18 . 94.1(5)    yes
C2 . Mn1 . C18 . 126.7(5)    yes
C3 . Mn1 . C18 . 162.5(5)    yes
C4 . Mn1 . C18 . 143.5(5)    yes
C5 . Mn1 . C18 . 107.2(5)    yes
C6 . Mn1 . C16 . 122.7(5)    yes
C6 . Mn1 . C17 . 146.6(5)    yes
C16 . Mn1 . C17 . 90.4(5)    yes
C6 . Mn1 . C18 . 86.3(5)    yes
C16 . Mn1 . C18 . 88.8(5)    yes
C17 . Mn1 . C18 . 90.8(5)    yes
C4 . O1 . C15 . 117.5(8)    yes
Mn1 . C1 . C2 . 69.7(5)    yes
Mn1 . C1 . C6 . 70.1(5)    yes
C2 . C1 . C6 . 116.6(9)    yes
Mn1 . C1 . C7 . 126.8(7)    yes
C2 . C1 . C7 . 121.7(9)    yes
C6 . C1 . C7 . 121.5(9)    yes
Mn1 . C2 . C1 . 72.1(5)    yes
Mn1 . C2 . C3 . 72.2(6)    yes
C1 . C2 . C3 . 121.2(9)    yes
Mn1 . C2 . H21 . 127.958    no
C1 . C2 . H21 . 119.012    no
C3 . C2 . H21 . 119.779    no
Mn1 . C3 . C2 . 70.4(6)    yes
Mn1 . C3 . C4 . 75.0(6)    yes
C2 . C3 . C4 . 120.9(9)    yes
Mn1 . C3 . H31 . 127.194    no
C2 . C3 . H31 . 119.229    no
C4 . C3 . H31 . 119.853    no
Mn1 . C4 . O1 . 130.8(7)    yes
Mn1 . C4 . C3 . 68.7(6)    yes
O1 . C4 . C3 . 126.3(9)    yes
Mn1 . C4 . C5 . 68.6(5)    yes
O1 . C4 . C5 . 114.6(9)    yes
C3 . C4 . C5 . 118.9(9)    yes
Mn1 . C5 . C4 . 74.4(5)    yes
Mn1 . C5 . C6 . 71.1(5)    yes
C4 . C5 . C6 . 120.8(9)    yes
Mn1 . C5 . H51 . 126.646    no
C4 . C5 . H51 . 119.304    no
C6 . C5 . H51 . 119.927    no
Mn1 . C6 . C1 . 71.5(5)    yes
Mn1 . C6 . C5 . 72.1(6)    yes
C1 . C6 . C5 . 121.1(8)    yes
Mn1 . C6 . H61 . 129.589    no
C1 . C6 . H61 . 119.477    no
C5 . C6 . H61 . 119.388    no
C1 . C7 . C8 . 176.2(11)    yes
C7 . C8 . C9 . 176.6(11)    yes
Cr1 . C9 . C8 . 131.2(8)    yes
Cr1 . C9 . C10 . 71.0(6)    yes
C8 . C9 . C10 . 118.3(10)    yes
Cr1 . C9 . C14 . 69.9(7)    yes
C8 . C9 . C14 . 121.9(10)    yes
C10 . C9 . C14 . 119.8(10)    yes
Cr1 . C10 . C9 . 71.6(6)    yes
Cr1 . C10 . C11 . 71.0(6)    yes
C9 . C10 . C11 . 117.3(9)    yes
Cr1 . C10 . H101 . 128.526    no
C9 . C10 . H101 . 121.222    no
C11 . C10 . H101 . 121.455    no
Cr1 . C11 . C10 . 71.8(6)    yes
Cr1 . C11 . C12 . 72.4(7)    yes
C10 . C11 . C12 . 123.0(11)    yes
Cr1 . C11 . H111 . 130.764    no
C10 . C11 . H111 . 118.249    no
C12 . C11 . H111 . 118.718    no
Cr1 . C12 . C11 . 71.5(7)    yes
Cr1 . C12 . C13 . 71.3(7)    yes
C11 . C12 . C13 . 119.2(11)    yes
Cr1 . C12 . H121 . 128.639    no
C11 . C12 . H121 . 120.658    no
C13 . C12 . H121 . 120.162    no
Cr1 . C13 . C12 . 71.7(7)    yes
Cr1 . C13 . C14 . 70.4(7)    yes
C12 . C13 . C14 . 119.9(11)    yes
Cr1 . C13 . H131 . 130.364    no
C12 . C13 . H131 . 120.289    no
C14 . C13 . H131 . 119.763    no
Cr1 . C14 . C9 . 73.0(6)    yes
Cr1 . C14 . C13 . 72.5(6)    yes
C9 . C14 . C13 . 120.6(12)    yes
Cr1 . C14 . H141 . 127.101    no
C9 . C14 . H141 . 119.664    no
C13 . C14 . H141 . 119.781    no
O1 . C15 . H151 . 109.250    no
O1 . C15 . H152 . 109.533    no
H151 . C15 . H152 . 109.390    no
O1 . C15 . H153 . 109.483    no
H151 . C15 . H153 . 109.673    no
H152 . C15 . H153 . 109.498    no
Mn1 . C16 . O2 . 179.9(11)    yes
Mn1 . C17 . O3 . 177.6(8)    yes
Mn1 . C18 . O4 . 177.9(11)    yes
Cr1 . C19 . O5 . 174.6(45)    yes
Cr1 . C20 . O6 . 175.7(14)    yes
Cr1 . C21 . O7 . 178.9(19)    yes
F1 . B1 . F2 . 104.3(19)    yes
F1 . B1 . F3 . 110.8(15)    yes
F2 . B1 . F3 . 103.6(17)    yes
F1 . B1 . F4 . 107.8(13)    yes
F2 . B1 . F4 . 112.3(19)    yes
F3 . B1 . F4 . 117.2(14)    yes
#===END
#==============
C24 H14 Cr O4 S
#==============

_chemical_name_systematic         
; 
? 
; 
 
_chemical_melting_point           ? 
 
_refine_ls_matrix_type            full 
 
_atom_sites_solution_primary      direct 
 
_atom_sites_solution_secondary difmap 
_atom_sites_solution_hydrogens    geom 
 
_refine_ls_hydrogen_treatment     refU 
 
_computing_structure_refinement 
; 
 CRYSTALS (Watkin et al 2003) 
; 
_computing_publication_material 
; 
 CRYSTALS (Watkin et al 2003) 
; 
_computing_molecular_graphics 
; 
 CAMERON (Watkin et al 1996) 
; 

_cell_length_a                    12.367(3)
_cell_angle_alpha                 90
_cell_length_b                    11.750(8)
_cell_angle_beta                  104.46(3)
_cell_length_c                    14.778(6)
_cell_angle_gamma                 90
_cell_volume                      2079.4(17)
 
_symmetry_cell_setting            'Monoclinic' 
_symmetry_space_group_name_H-M    'P 1 21/c 1 ' 
loop_
 _symmetry_equiv_pos_as_xyz
 'x,y,z'
 '-x,-y,-z'
 '-x,y+1/2,-z+1/2'
 'x,-y+1/2,z+1/2'
 

_chemical_absolute_configuration  '.' 
 
loop_
_atom_type_symbol
_atom_type_scat_dispersion_real
_atom_type_scat_dispersion_imag
_atom_type_scat_Cromer_Mann_a1
_atom_type_scat_Cromer_Mann_b1
_atom_type_scat_Cromer_Mann_a2
_atom_type_scat_Cromer_Mann_b2
_atom_type_scat_Cromer_Mann_a3
_atom_type_scat_Cromer_Mann_b3
_atom_type_scat_Cromer_Mann_a4
_atom_type_scat_Cromer_Mann_b4
_atom_type_scat_Cromer_Mann_c
_atom_type_scat_source  
 'C   '    0.0033    0.0016    2.3100   20.8439
    1.0200   10.2075    1.5886    0.5687    0.8650   51.6512    0.2156
'International_Tables_Vol_IV_Table_2.2B'
 'H   '    0.0000    0.0000    0.4930   10.5109
    0.3229   26.1257    0.1402    3.1424    0.0408   57.7998    0.0030
'International_Tables_Vol_IV_Table_2.2B'
 'Cr  '    0.3209    0.6236   10.6406    6.1038
    7.3537    0.3920    3.3240   20.2626    1.4922   98.7399    1.1832
'International_Tables_Vol_IV_Table_2.2B'
 'O   '    0.0106    0.0060    3.0485   13.2771
    2.2868    5.7011    1.5463    0.3239    0.8670   32.9089    0.2508
'International_Tables_Vol_IV_Table_2.2B'
 'S   '    0.1246    0.1234    6.9053    1.4679
    5.2034   22.2151    1.4379    0.2536    1.5863   56.1720    0.8669
'International_Tables_Vol_IV_Table_2.2B'
 
 
_cell_formula_units_Z                    4
_chemical_formula_sum             ' C24 H14 Cr O4 S '
_chemical_formula_moiety          ' C24 H14 Cr O4 S '
_chemical_compound_source
;
?
;
_chemical_formula_weight            450.44
 
 
_cell_measurement_reflns_used           25
_cell_measurement_theta_min             11.9
_cell_measurement_theta_max             12.3
_cell_measurement_temperature          295
 
_exptl_crystal_description        ' plate ' 
_exptl_crystal_colour             ' pale orange ' 
_exptl_crystal_size_min           0.15
_exptl_crystal_size_mid           0.30 
_exptl_crystal_size_max           0.35
 
_exptl_crystal_density_diffrn     1.439 
_exptl_crystal_density_meas       ? 
_exptl_crystal_F_000              920 
_exptl_absorpt_coefficient_mu     0.678 
 
_diffrn_measurement_device_type 
; 
Nonius Mach-3
; 
_diffrn_radiation_monochromator   graphite 
_computing_data_collection 
; 
 DATA COLLECTION 
; 
_computing_data_reduction 
; 
 RC93 (Watkin, Prout & Lilley, 1994) 
; 
_computing_cell_refinement 
; 
 Cad4 Express, (Enraf-Nonius, 1989) 
; 
_computing_structure_solution 
; 
 SHELXS 86 (Sheldrick, 1986) 
; 
 
_diffrn_measurement_method        \w/2\q 
 
_exptl_absorpt_correction_type    refdelf 
_exptl_absorpt_process_details 
; 
 DIFABS (Walker & Stuart, 1983) 
; 
_exptl_absorpt_correction_T_min   0.84 
_exptl_absorpt_correction_T_max  0.90

 
_diffrn_standards_interval_time   3600 
_diffrn_standards_interval_count  0 
_diffrn_standards_number          2 
_diffrn_standards_decay_%         6.34 
 
_diffrn_ambient_temperature        295
_diffrn_reflns_number             4041 
_reflns_number_total              3849 
_diffrn_reflns_av_R_equivalents   0.07 

_diffrn_reflns_theta_min          1.423 
_diffrn_reflns_theta_max          24.978 
_diffrn_measured_fraction_theta_max  0.999 
 
_diffrn_reflns_theta_full  24.978 
_diffrn_measured_fraction_theta_full  0.999 
 
 
_diffrn_reflns_limit_h_min        0 
_diffrn_reflns_limit_h_max        14 
_diffrn_reflns_limit_k_min        0 
_diffrn_reflns_limit_k_max        13 
_diffrn_reflns_limit_l_min        -17 
_diffrn_reflns_limit_l_max        17 
_reflns_limit_h_min               -14 
_reflns_limit_h_max               14 
_reflns_limit_k_min               0 
_reflns_limit_k_max               13 
_reflns_limit_l_min               0 
_reflns_limit_l_max               17 
 
 
_refine_diff_density_min          -0.32 
_refine_diff_density_max          0.39 
 
 
_refine_ls_number_reflns          905 
_refine_ls_number_restraints      0 
_refine_ls_number_parameters      132 
 
_refine_ls_R_factor_ref 0.0747 
_refine_ls_wR_factor_ref           0.0876 
_refine_ls_goodness_of_fit_ref    1.1177 
 
_reflns_number_all 3849 
_refine_ls_R_factor_all           0.3193 
_refine_ls_wR_factor_all         0.2691 
 
# The I/u(I) cutoff below was used for refinement as 
# well as the _gt R-factors:
_reflns_threshold_expression      I>3.00u(I)
_reflns_number_gt                 905 
_refine_ls_R_factor_gt            0.0747 
_refine_ls_wR_factor_gt            0.0876 
 
 
_refine_ls_shift/su_max           0.000080 
_refine_ls_structure_factor_coef  F 
_refine_ls_weighting_scheme       calc 
_refine_ls_weighting_details 
;
 Method, part 1, Chebychev polynomial, (Watkin, 1994, Prince, 1982) 
 [weight] = 1.0/[A~0~*T~0~(x)+A~1~*T~1~(x) ... +A~n-1~]*T~n-1~(x)] 
 where A~i~ are the Chebychev coefficients listed below and x= Fcalc/Fmax 
 Method = Robust Weighting (Prince, 1982) 
 W = [weight] * [1-(deltaF/6*sigmaF)^2^]^2^ 
 A~i~ are: 
 3.47 1.79 2.80 
;
_diffrn_radiation_type            'Mo K\a'
_diffrn_radiation_wavelength           0.71073
 
 
_publ_section_references 
; 
 
  
Betteridge, P.W., Carruthers, J.R., Cooper, R.I., 
Prout, K., Watkin, D.J. (2003). J. Appl. Cryst. 36, 1487. 
 
 
Prince, E. 
Mathematical Techniques in Crystallography 
and Materials Science 
Springer-Verlag, New York, 1982. 
 
 
Sheldrick, G.M. (1986). SHELXS86. Program for the solution of 
crystal structures. Univ. of Gottingen, Federal Republic of Germany. 
 
 
Walker, N., and Stuart, D. Acta Cryst, (1983) A39, 158-166 
 
 
Watkin D.J. (1994), 
Acta Cryst, A50, 411-437 
 
 
Watkin, D.J., Prout, C.K. & Pearce, L.J. (1996) CAMERON, Chemical 
Crystallography Laboratory, OXFORD, UK. 
; 

loop_
_atom_site_label
_atom_site_type_symbol
_atom_site_fract_x
_atom_site_fract_y
_atom_site_fract_z
_atom_site_U_iso_or_equiv
_atom_site_occupancy
_atom_site_adp_type
_atom_site_refinement_flags_posn
_atom_site_refinement_flags_adp
_atom_site_refinement_flags_occupancy
_atom_site_refinement_disorder_assembly
_atom_site_refinement_disorder_group
_atom_site_attached_hydrogens
Cr1 Cr 0.23838(18) 0.12268(18) 0.13020(15) 0.0641 1.0000 Uani . . . . . . 
S1 S 0.7725(3) 0.0264(3) 0.2653(3) 0.0816 1.0000 Uani . . . . . . 
C1 C 1.1641(11) -0.0940(12) 0.4526(9) 0.071(4) 1.0000 Uiso . . . . . . 
C2 C 1.2695(13) -0.0519(12) 0.4680(10) 0.080(5) 1.0000 Uiso . . . . . . 
C3 C 1.3583(12) -0.1215(13) 0.5192(10) 0.081(4) 1.0000 Uiso . . . . . . 
C4 C 1.3326(11) -0.2231(12) 0.5488(9) 0.068(4) 1.0000 Uiso . . . . . . 
C5 C 1.2303(14) -0.2628(15) 0.5337(11) 0.099(5) 1.0000 Uiso . . . . . . 
C6 C 1.1409(14) -0.1982(16) 0.4838(12) 0.099(5) 1.0000 Uiso . . . . . . 
C7 C 1.0733(13) -0.0244(13) 0.3985(10) 0.080(4) 1.0000 Uiso . . . . . . 
C8 C 0.9946(12) 0.0262(13) 0.3533(10) 0.077(4) 1.0000 Uiso . . . . . . 
C9 C 0.9013(11) 0.0892(12) 0.3001(9) 0.069(4) 1.0000 Uiso . . . . . . 
C10 C 0.8988(12) 0.1997(13) 0.2743(10) 0.079(4) 1.0000 Uiso . . . . . . 
C11 C 0.7914(12) 0.2343(13) 0.2269(10) 0.078(4) 1.0000 Uiso . . . . . . 
C12 C 0.7155(11) 0.1500(11) 0.2136(9) 0.067(4) 1.0000 Uiso . . . . . . 
C13 C 0.5990(12) 0.1541(12) 0.1669(10) 0.074(4) 1.0000 Uiso . . . . . . 
C14 C 0.5016(11) 0.1563(11) 0.1290(9) 0.071(4) 1.0000 Uiso . . . . . . 
C15 C 0.3858(10) 0.1726(11) 0.0821(9) 0.061(4) 1.0000 Uiso . . . . . . 
C16 C 0.3266(11) 0.2712(12) 0.0922(10) 0.074(4) 1.0000 Uiso . . . . . . 
C17 C 0.2108(12) 0.2800(13) 0.0437(10) 0.083(4) 1.0000 Uiso . . . . . . 
C18 C 0.1625(11) 0.1907(13) -0.0097(10) 0.072(4) 1.0000 Uiso . . . . . . 
C19 C 0.2203(12) 0.0882(12) -0.0201(9) 0.070(4) 1.0000 Uiso . . . . . . 
C20 C 0.3306(11) 0.0785(12) 0.0244(9) 0.071(4) 1.0000 Uiso . . . . . . 
C21 C 1.5197(13) -0.2623(15) 0.6284(12) 0.101(5) 1.0000 Uiso . . . . . . 
C101 C 0.2047(12) 0.1934(14) 0.2244(12) 0.084(4) 1.0000 Uiso . . . . . . 
C102 C 0.1196(13) 0.0346(13) 0.1294(10) 0.077(4) 1.0000 Uiso . . . . . . 
C103 C 0.3262(12) 0.0310(13) 0.2135(11) 0.082(4) 1.0000 Uiso . . . . . . 
O1 O 1.4130(11) -0.3046(11) 0.5952(9) 0.124(4) 1.0000 Uiso . . . . . . 
O101 O 0.1844(9) 0.2449(10) 0.2868(8) 0.111(4) 1.0000 Uiso . . . . . . 
O102 O 0.0434(10) -0.0266(10) 0.1274(7) 0.103(3) 1.0000 Uiso . . . . . . 
O103 O 0.3849(9) -0.0248(10) 0.2700(8) 0.104(3) 1.0000 Uiso . . . . . . 
H21 H 1.2842 0.0248 0.4443 0.115(13) 1.0000 Uiso . . . . . . 
H31 H 1.4376 -0.0949 0.5327 0.115(13) 1.0000 Uiso . . . . . . 
H51 H 1.2168 -0.3395 0.5582 0.115(13) 1.0000 Uiso . . . . . . 
H61 H 1.0626 -0.2271 0.4713 0.115(13) 1.0000 Uiso . . . . . . 
H101 H 0.9657 0.2506 0.2876 0.115(13) 1.0000 Uiso . . . . . . 
H111 H 0.7729 0.3141 0.2049 0.115(13) 1.0000 Uiso . . . . . . 
H161 H 0.3646 0.3350 0.1327 0.115(13) 1.0000 Uiso . . . . . . 
H171 H 0.1669 0.3500 0.0491 0.115(13) 1.0000 Uiso . . . . . . 
H181 H 0.0819 0.1971 -0.0437 0.115(13) 1.0000 Uiso . . . . . . 
H191 H 0.1805 0.0244 -0.0595 0.115(13) 1.0000 Uiso . . . . . . 
H201 H 0.3730 0.0078 0.0176 0.115(13) 1.0000 Uiso . . . . . . 
H211 H 1.5708 -0.3239 0.6605 0.115(13) 1.0000 Uiso . . . . . . 
H212 H 1.5476 -0.2314 0.5753 0.115(13) 1.0000 Uiso . . . . . . 
H213 H 1.5188 -0.1992 0.6743 0.115(13) 1.0000 Uiso . . . . . . 
loop_
_atom_site_aniso_label
_atom_site_aniso_U_11
_atom_site_aniso_U_22
_atom_site_aniso_U_33
_atom_site_aniso_U_23
_atom_site_aniso_U_13
_atom_site_aniso_U_12
Cr1 0.0631(14) 0.0707(15) 0.0587(13) 0.0023(13) 0.0154(10) -0.0055(14) 
S1 0.075(3) 0.071(3) 0.098(3) 0.005(2) 0.020(2) -0.003(2) 
_refine_ls_extinction_method 
    'None'
loop_
 _geom_bond_atom_site_label_1
 _geom_bond_site_symmetry_1
 _geom_bond_atom_site_label_2
 _geom_bond_site_symmetry_2
 _geom_bond_distance
 _geom_bond_publ_flag
Cr1 . C103 . 1.785(16)    yes
Cr1 . C102 . 1.795(16)    yes
Cr1 . C101 . 1.759(18)    yes
Cr1 . C20 . 2.215(13)    yes
Cr1 . C19 . 2.213(14)    yes
Cr1 . C18 . 2.197(14)    yes
Cr1 . C17 . 2.225(15)    yes
Cr1 . C16 . 2.204(14)    yes
Cr1 . C15 . 2.195(13)    yes
S1 . C12 . 1.709(13)    yes
S1 . C9 . 1.714(14)    yes
C1 . C7 . 1.456(19)    yes
C1 . C6 . 1.36(2)    yes
C1 . C2 . 1.359(18)    yes
C2 . H21 . 1.000    no
C2 . C3 . 1.425(18)    yes
C3 . H31 . 1.000    no
C3 . C4 . 1.337(17)    yes
C4 . O1 . 1.426(16)    yes
C4 . C5 . 1.314(18)    yes
C5 . H51 . 1.000    no
C5 . C6 . 1.39(2)    yes
C6 . H61 . 1.000    no
C7 . C8 . 1.192(17)    yes
C8 . C9 . 1.430(19)    yes
C9 . C10 . 1.351(19)    yes
C10 . H101 . 1.000    no
C10 . C11 . 1.398(18)    yes
C11 . H111 . 1.000    no
C11 . C12 . 1.345(17)    yes
C12 . C13 . 1.434(18)    yes
C13 . C14 . 1.194(16)    yes
C14 . C15 . 1.440(17)    yes
C15 . C20 . 1.458(18)    yes
C15 . C16 . 1.398(17)    yes
C16 . H161 . 1.000    no
C16 . C17 . 1.436(18)    yes
C17 . H171 . 1.000    no
C17 . C18 . 1.358(18)    yes
C18 . H181 . 1.000    no
C18 . C19 . 1.429(18)    yes
C19 . H191 . 1.000    no
C19 . C20 . 1.363(17)    yes
C20 . H201 . 1.000    no
C21 . H213 . 1.007    no
C21 . H212 . 1.001    no
C21 . H211 . 0.999    no
C21 . O1 . 1.381(17)    yes
C101 . O101 . 1.181(17)    yes
C102 . O102 . 1.179(15)    yes
C103 . O103 . 1.163(15)    yes
loop_
 _geom_angle_atom_site_label_1
 _geom_angle_site_symmetry_1
 _geom_angle_atom_site_label_2
 _geom_angle_site_symmetry_2
 _geom_angle_atom_site_label_3
 _geom_angle_site_symmetry_3
 _geom_angle
 _geom_angle_publ_flag
C103 . Cr1 . C102 . 90.7(7)    yes
C103 . Cr1 . C101 . 87.9(7)    yes
C102 . Cr1 . C101 . 85.6(7)    yes
C103 . Cr1 . C20 . 90.8(6)    yes
C102 . Cr1 . C20 . 115.2(6)    yes
C101 . Cr1 . C20 . 159.3(6)    yes
C103 . Cr1 . C19 . 118.2(6)    yes
C102 . Cr1 . C19 . 90.6(6)    yes
C101 . Cr1 . C19 . 153.7(6)    yes
C20 . Cr1 . C19 . 35.9(5)    yes
C103 . Cr1 . C18 . 155.8(6)    yes
C102 . Cr1 . C18 . 92.7(6)    yes
C101 . Cr1 . C18 . 116.3(6)    yes
C20 . Cr1 . C18 . 66.1(5)    yes
C19 . Cr1 . C18 . 37.8(5)    yes
C103 . Cr1 . C17 . 151.3(6)    yes
C102 . Cr1 . C17 . 117.9(6)    yes
C101 . Cr1 . C17 . 91.7(7)    yes
C20 . Cr1 . C17 . 79.7(5)    yes
C19 . Cr1 . C17 . 67.2(5)    yes
C103 . Cr1 . C16 . 113.5(6)    yes
C102 . Cr1 . C16 . 155.7(6)    yes
C101 . Cr1 . C16 . 93.3(6)    yes
C20 . Cr1 . C16 . 68.3(5)    yes
C19 . Cr1 . C16 . 79.7(5)    yes
C103 . Cr1 . C15 . 88.4(6)    yes
C102 . Cr1 . C15 . 153.7(6)    yes
C101 . Cr1 . C15 . 120.7(6)    yes
C20 . Cr1 . C15 . 38.6(5)    yes
C19 . Cr1 . C15 . 66.9(5)    yes
C18 . Cr1 . C17 . 35.8(5)    yes
C18 . Cr1 . C16 . 66.1(5)    yes
C17 . Cr1 . C16 . 37.8(5)    yes
C18 . Cr1 . C15 . 78.0(5)    yes
C17 . Cr1 . C15 . 67.2(5)    yes
C16 . Cr1 . C15 . 37.1(5)    yes
C12 . S1 . C9 . 91.0(7)    yes
C7 . C1 . C6 . 119.4(14)    yes
C7 . C1 . C2 . 117.6(14)    yes
C6 . C1 . C2 . 122.9(14)    yes
H21 . C2 . C3 . 121.312    no
H21 . C2 . C1 . 121.322    no
C3 . C2 . C1 . 117.4(13)    yes
H31 . C3 . C4 . 120.943    no
H31 . C3 . C2 . 120.902    no
C4 . C3 . C2 . 118.2(13)    yes
O1 . C4 . C5 . 111.6(14)    yes
O1 . C4 . C3 . 124.3(14)    yes
C5 . C4 . C3 . 124.0(15)    yes
H51 . C5 . C6 . 120.059    no
H51 . C5 . C4 . 119.960    no
C6 . C5 . C4 . 120.0(17)    yes
H61 . C6 . C1 . 121.242    no
H61 . C6 . C5 . 121.165    no
C1 . C6 . C5 . 117.6(16)    yes
C8 . C7 . C1 . 175.6(16)    yes
C9 . C8 . C7 . 178.8(16)    yes
C10 . C9 . S1 . 112.0(11)    yes
C10 . C9 . C8 . 127.7(13)    yes
S1 . C9 . C8 . 120.3(11)    yes
H101 . C10 . C11 . 124.085    no
H101 . C10 . C9 . 124.031    no
C11 . C10 . C9 . 111.9(13)    yes
H111 . C11 . C12 . 123.233    no
H111 . C11 . C10 . 123.181    no
C12 . C11 . C10 . 113.6(14)    yes
C13 . C12 . C11 . 128.8(13)    yes
C13 . C12 . S1 . 119.8(10)    yes
C11 . C12 . S1 . 111.4(10)    yes
C14 . C13 . C12 . 179.0(15)    yes
C15 . C14 . C13 . 173.6(15)    yes
C20 . C15 . C16 . 120.6(11)    yes
C20 . C15 . C14 . 116.4(12)    yes
C16 . C15 . C14 . 122.9(12)    yes
C20 . C15 . Cr1 . 71.4(7)    yes
C16 . C15 . Cr1 . 71.8(7)    yes
C14 . C15 . Cr1 . 128.0(9)    yes
H161 . C16 . C17 . 120.333    no
H161 . C16 . C15 . 120.334    no
C17 . C16 . C15 . 119.3(13)    yes
H161 . C16 . Cr1 . 128.953    no
C17 . C16 . Cr1 . 71.9(8)    yes
C15 . C16 . Cr1 . 71.1(8)    yes
H171 . C17 . C18 . 120.886    no
H171 . C17 . C16 . 120.831    no
C18 . C17 . C16 . 118.3(14)    yes
H171 . C17 . Cr1 . 130.222    no
C18 . C17 . Cr1 . 71.0(8)    yes
C16 . C17 . Cr1 . 70.3(8)    yes
H181 . C18 . C19 . 118.210    no
H181 . C18 . C17 . 118.162    no
C19 . C18 . C17 . 123.6(13)    yes
H181 . C18 . Cr1 . 129.607    no
C19 . C18 . Cr1 . 71.7(8)    yes
C17 . C18 . Cr1 . 73.2(8)    yes
H191 . C19 . C20 . 120.446    no
H191 . C19 . C18 . 120.451    no
C20 . C19 . C18 . 119.1(13)    yes
H191 . C19 . Cr1 . 129.272    no
C20 . C19 . Cr1 . 72.1(8)    yes
C18 . C19 . Cr1 . 70.5(8)    yes
H201 . C20 . C19 . 120.504    no
H201 . C20 . C15 . 120.496    no
C19 . C20 . C15 . 119.0(13)    yes
H201 . C20 . Cr1 . 129.861    no
C19 . C20 . Cr1 . 72.0(8)    yes
C15 . C20 . Cr1 . 70.0(7)    yes
H213 . C21 . H212 . 108.858    no
H213 . C21 . H211 . 109.017    no
H212 . C21 . H211 . 109.513    no
H213 . C21 . O1 . 109.545    no
H212 . C21 . O1 . 109.755    no
H211 . C21 . O1 . 110.130    no
O101 . C101 . Cr1 . 177.2(14)    yes
O102 . C102 . Cr1 . 177.4(13)    yes
O103 . C103 . Cr1 . 177.2(13)    yes
C21 . O1 . C4 . 114.7(13)    yes
#===END
